# Supplementary material for: Phosphorylation-Regulated Dynamic Phase Separation of HIP-55 Protects Against Heart Failure
Source: PubMed Central journal article supplement — Circulation. 2024 Feb 8;150(12):938–51. doi: 10.1161/CIRCULATIONAHA.123.067519 (PMC11404759; doi:10.1161/circulationaha.123.067519), 2024-02-08

### Full unedited gel

Full unedited gel for Figure 1A

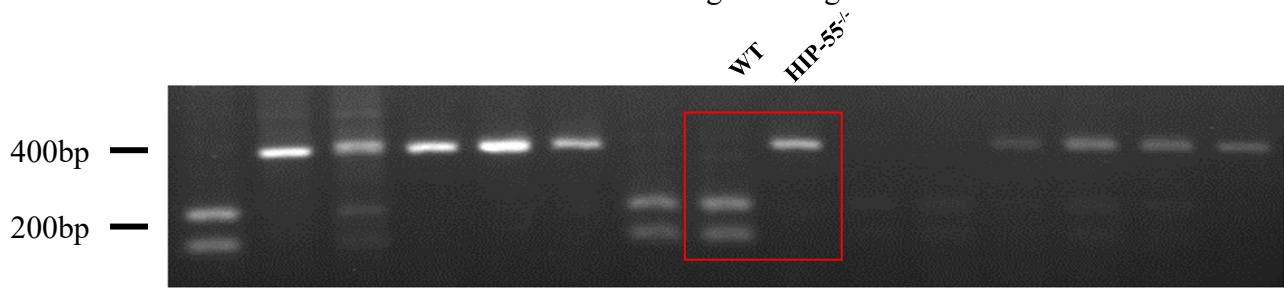

Full unedited gel for Figure 1B

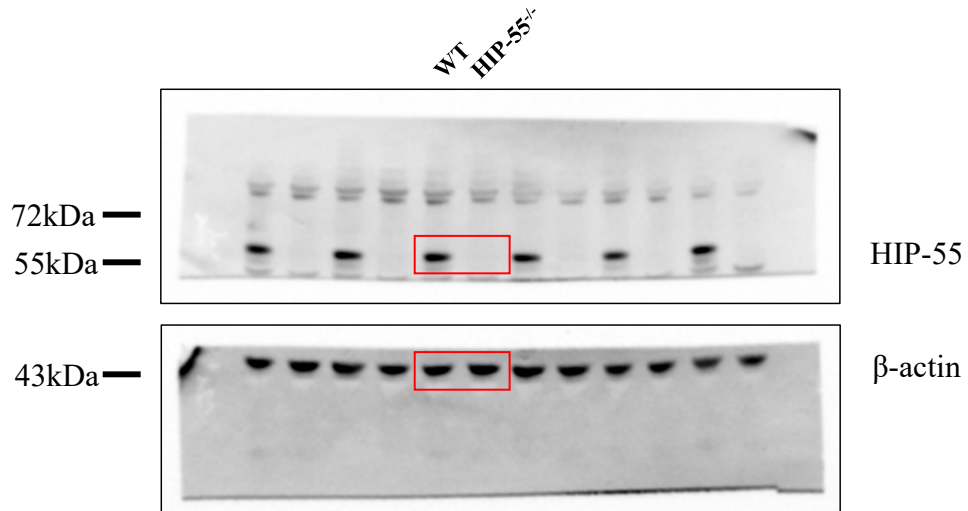

Full unedited gel for Figure 2A

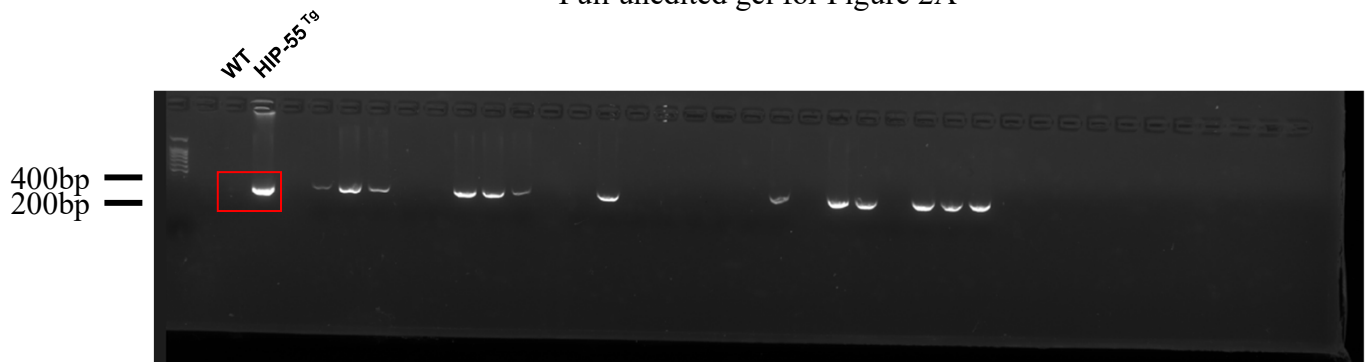

Full unedited gel for Figure 2B

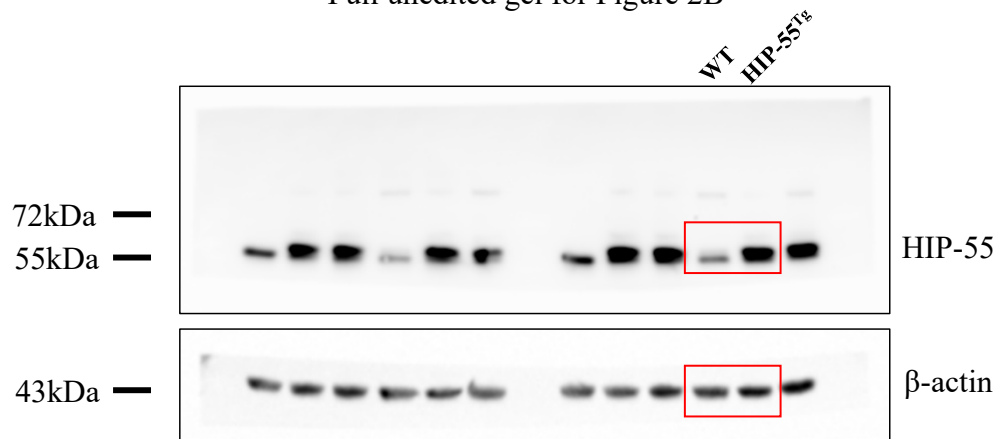

# Full unedited gel

Full unedited gel for Figure 5A

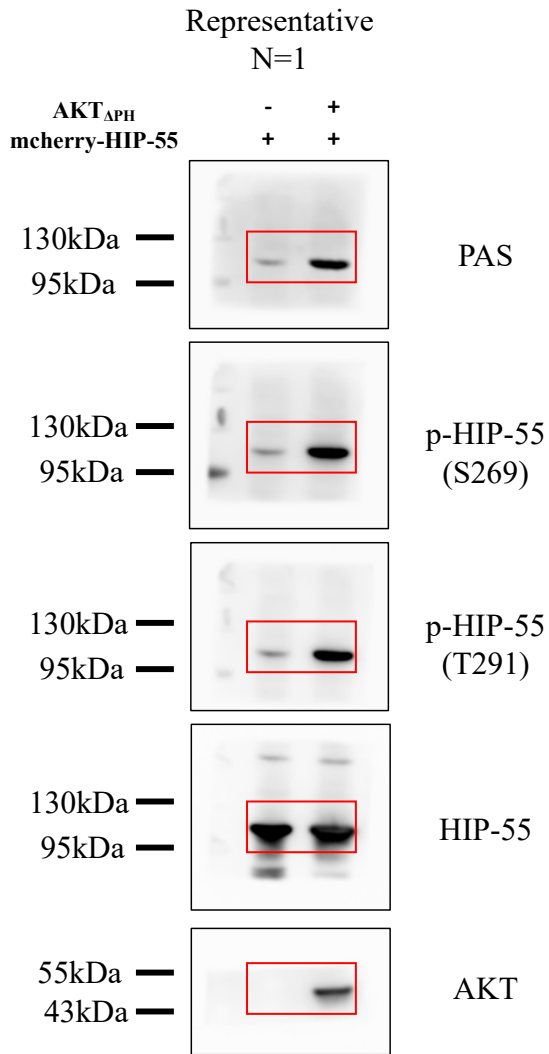

Full unedited gel for Figure 5A

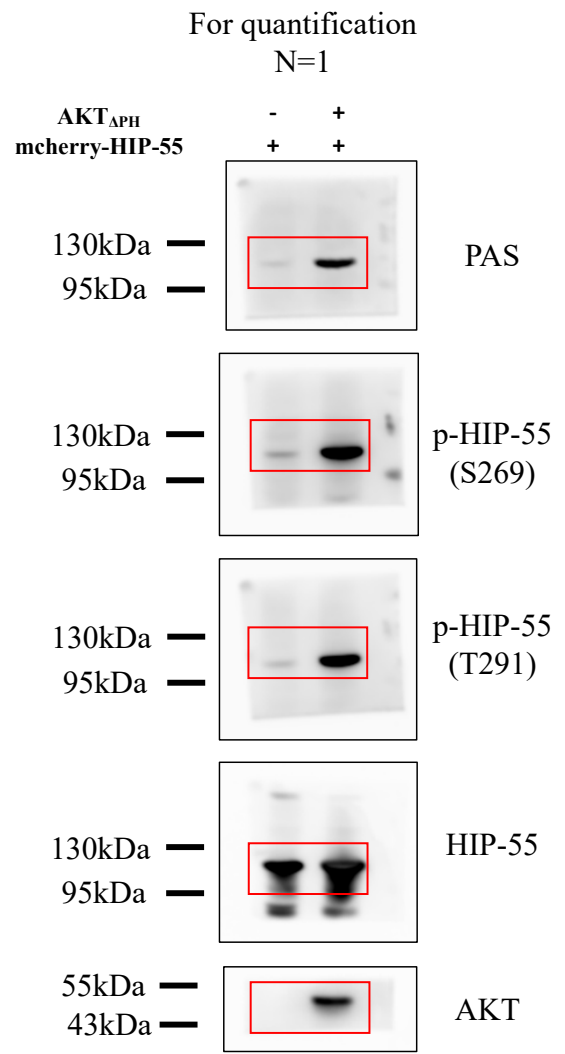

# Full unedited gel

Full unedited gel for Figure 5A

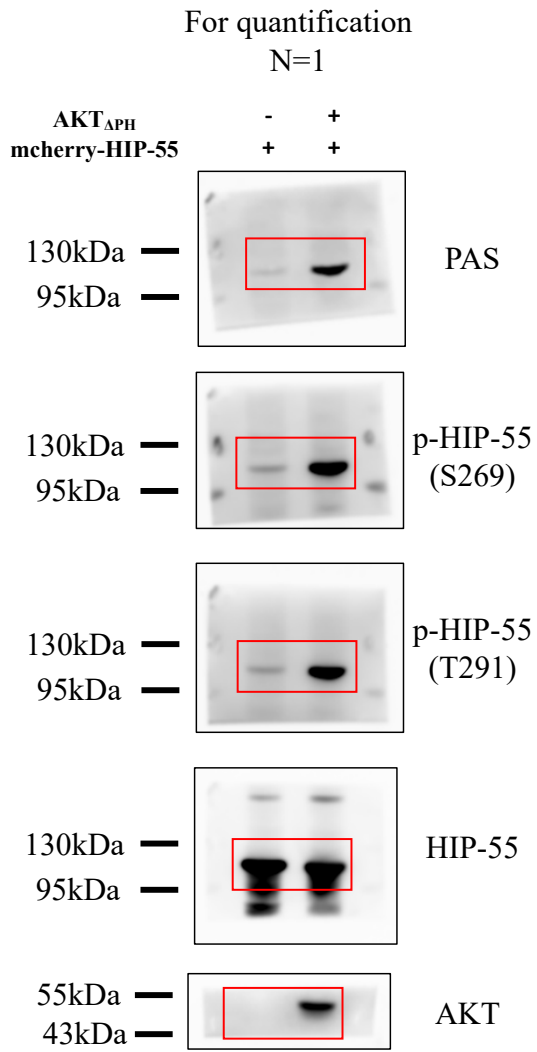

Full unedited gel for Figure 5A

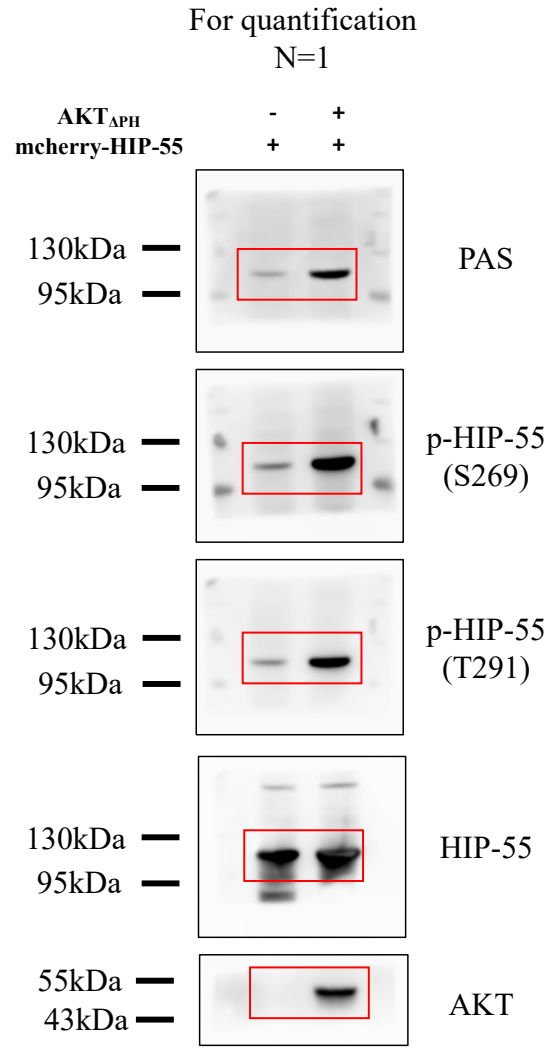

# Full unedited gel

Full unedited gel for Figure 5A

For quantification

N=1

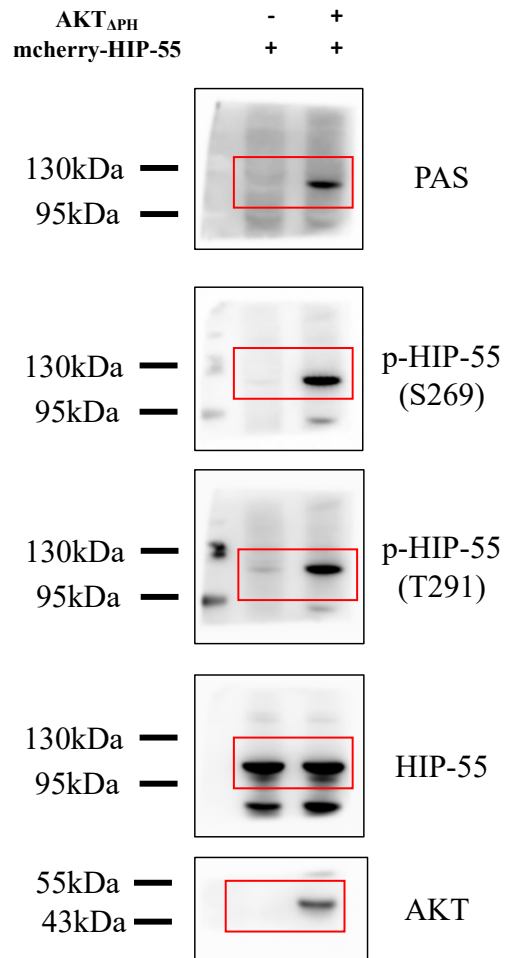

# Full unedited gel

Full unedited gel for Figure 5C

Representative  
N=2

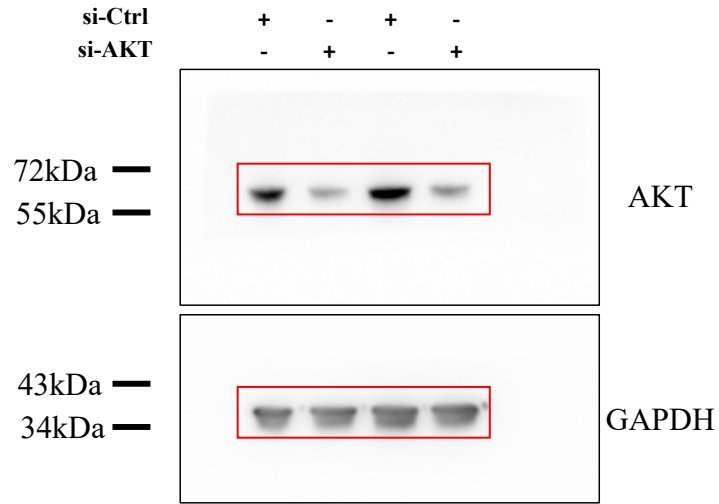

Full unedited gel for Figure 5C

For quantification  
N=2

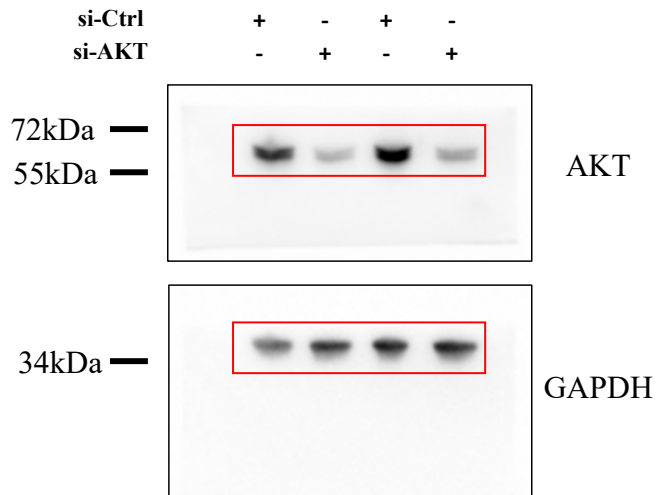

Full unedited gel for Figure 5C

For quantification  
N=1

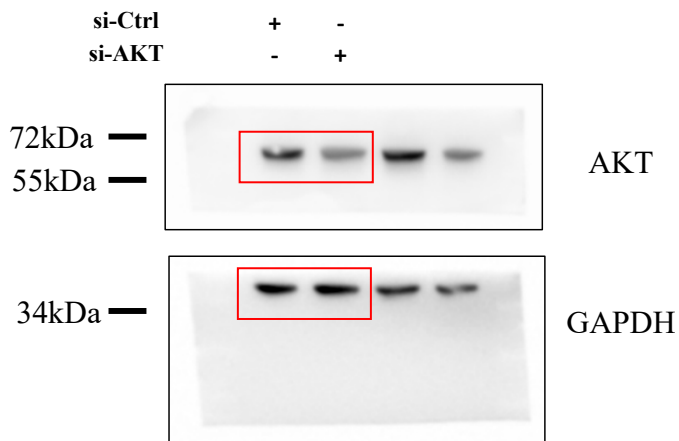

### Full unedited gel

Full unedited gel for Figure 5F

Representative  
N=1

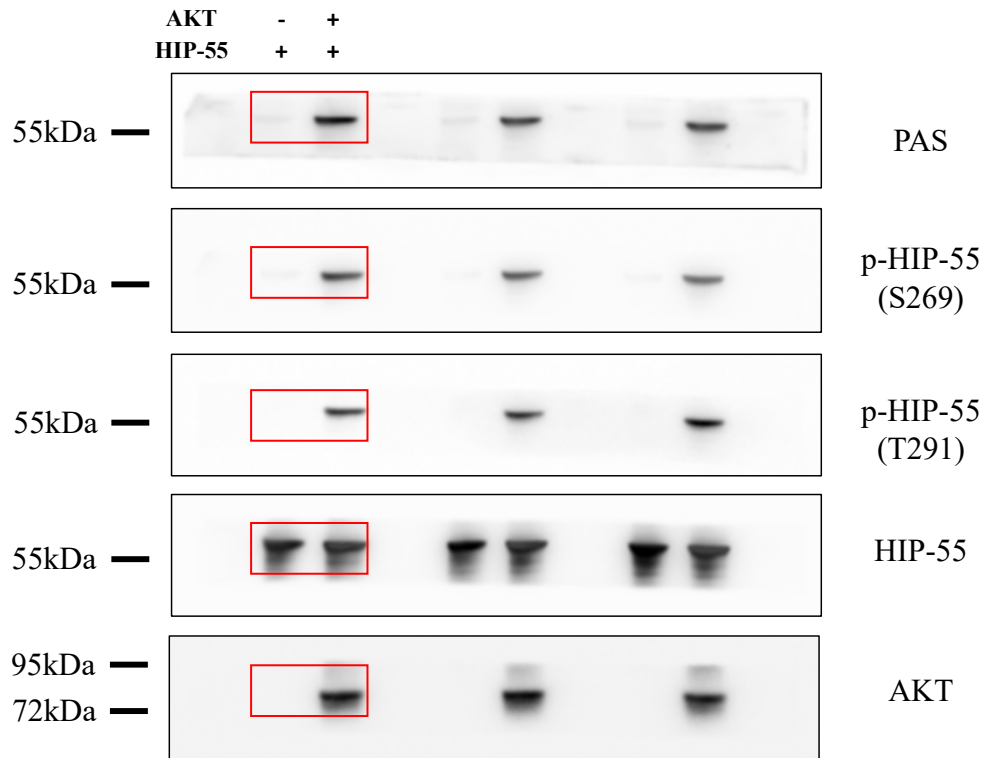

Full unedited gel for Figure 5F

For quantification  
N=2

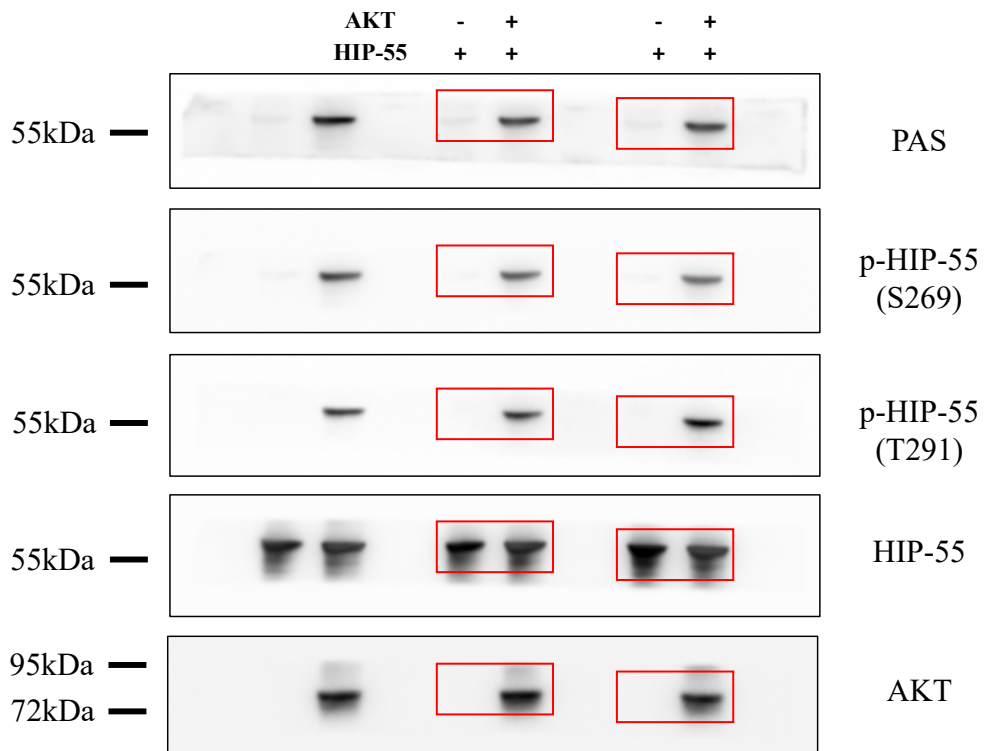

# Full unedited gel

Full unedited gel for Figure 5F

For quantification

N=2

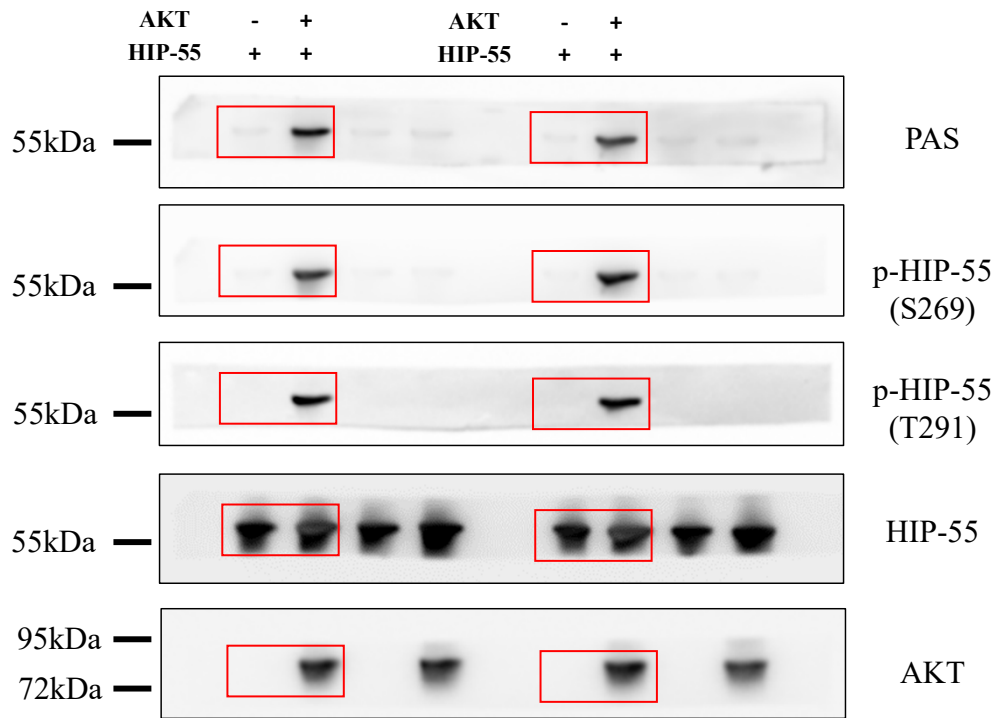

## Full unedited gel

Full unedited gel for Figure 5I

Representative  
N=1

|           |   |   |   |   |
|-----------|---|---|---|---|
| AKT       | - | + | - | + |
| HIP-55 WT | + | + | - | - |
| HIP-55 AA | - | - | + | + |

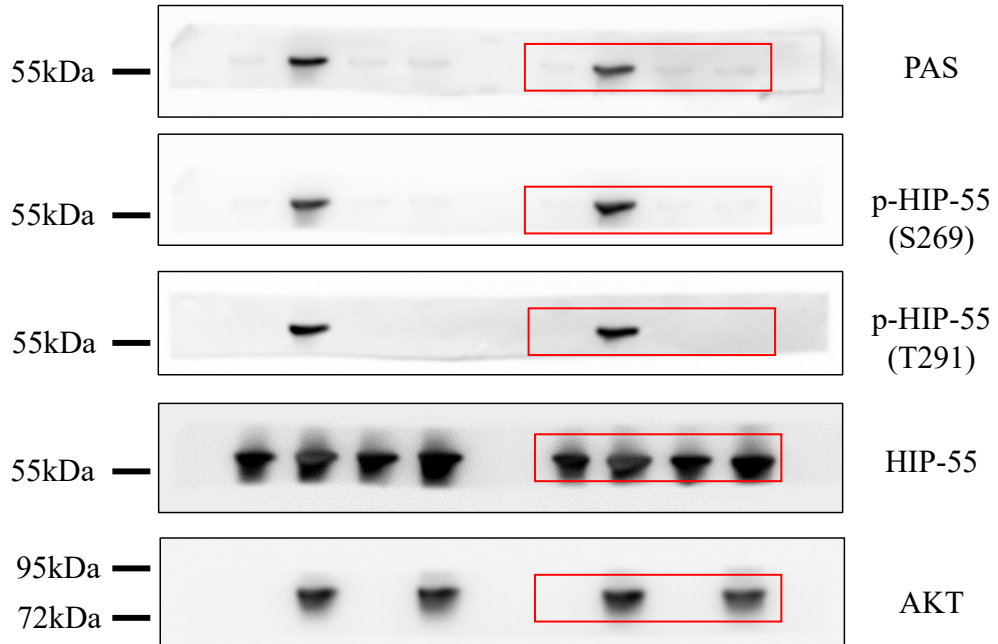

Full unedited gel for Figure 5I

For quantification  
N=1

|           |   |   |   |   |
|-----------|---|---|---|---|
| AKT       | - | + | - | + |
| HIP-55 WT | + | + | - | - |
| HIP-55 AA | - | - | + | + |

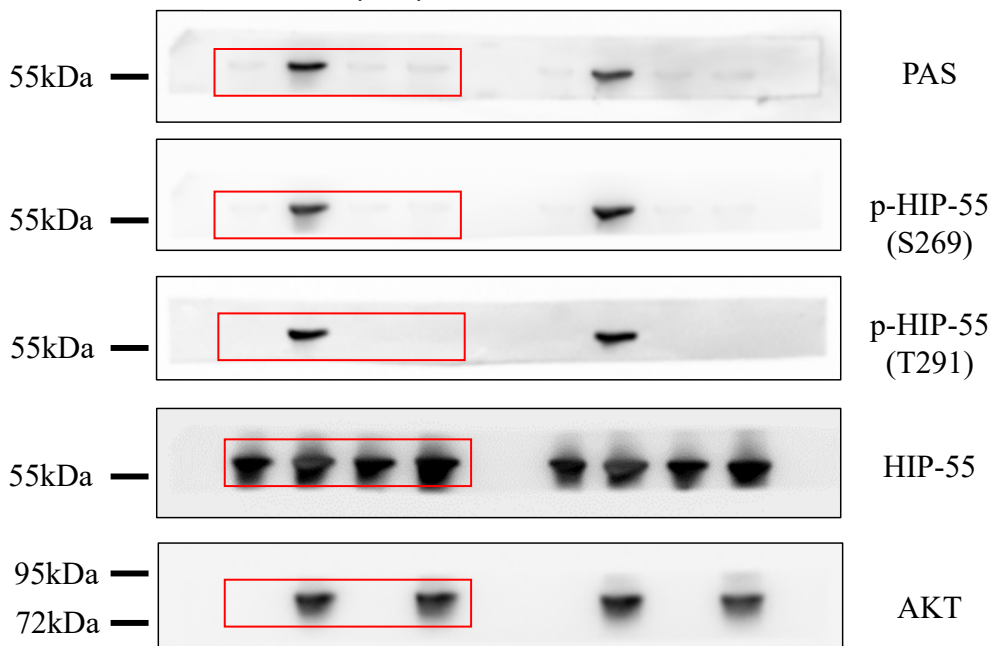



# Full unedited gel

Full unedited gel for Figure 5I

For quantification  
N=1

|           |   |   |   |   |
|-----------|---|---|---|---|
| AKT       | - | + | - | + |
| HIP-55 WT | + | + | - | - |
| HIP-55 AA | - | - | + | + |

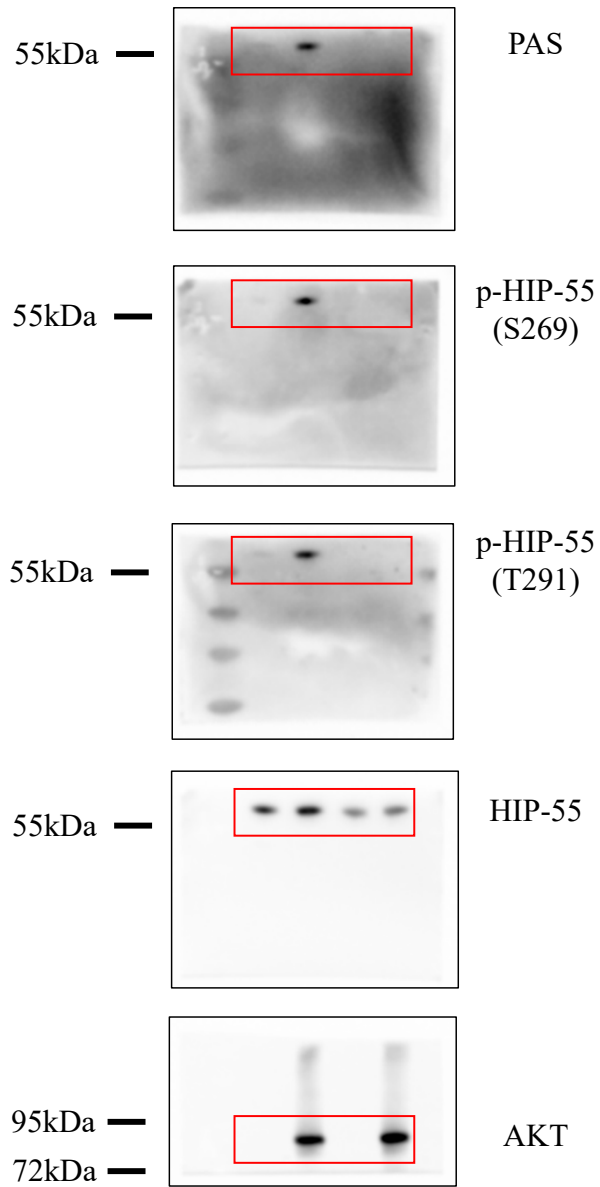

# Full unedited gel

Full unedited gel for Figure 5I

For quantification  
N=1

|           |   |   |   |   |
|-----------|---|---|---|---|
| AKT       | - | + | - | + |
| HIP-55 WT | + | + | - | - |
| HIP-55 AA | - | - | + | + |

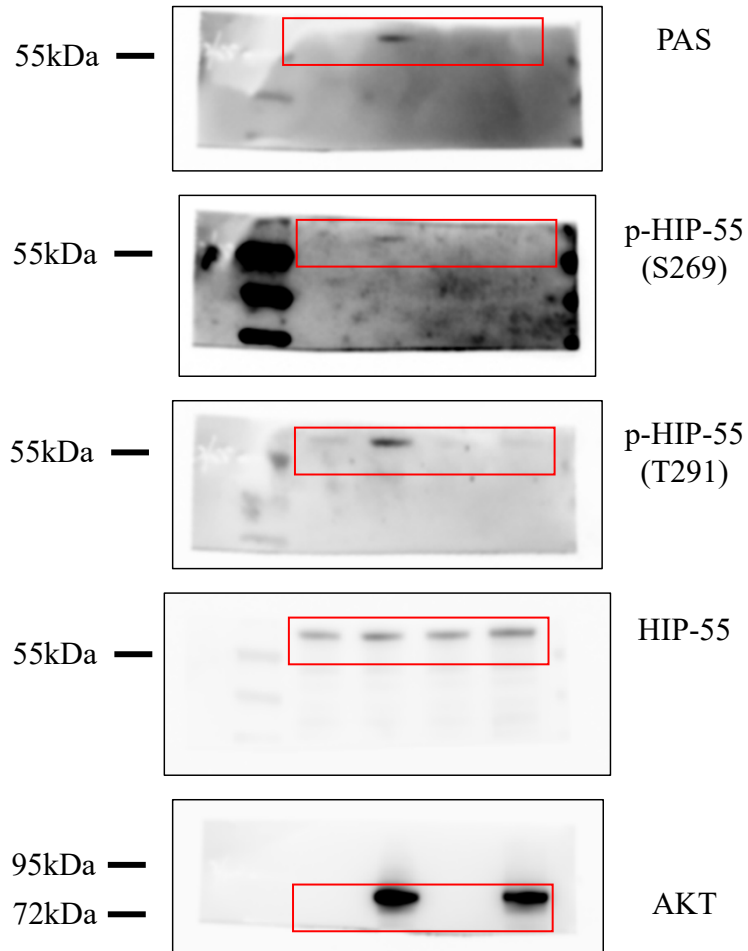

# Full unedited gel

Full unedited gel for Figure 5I

For quantification  
N=1

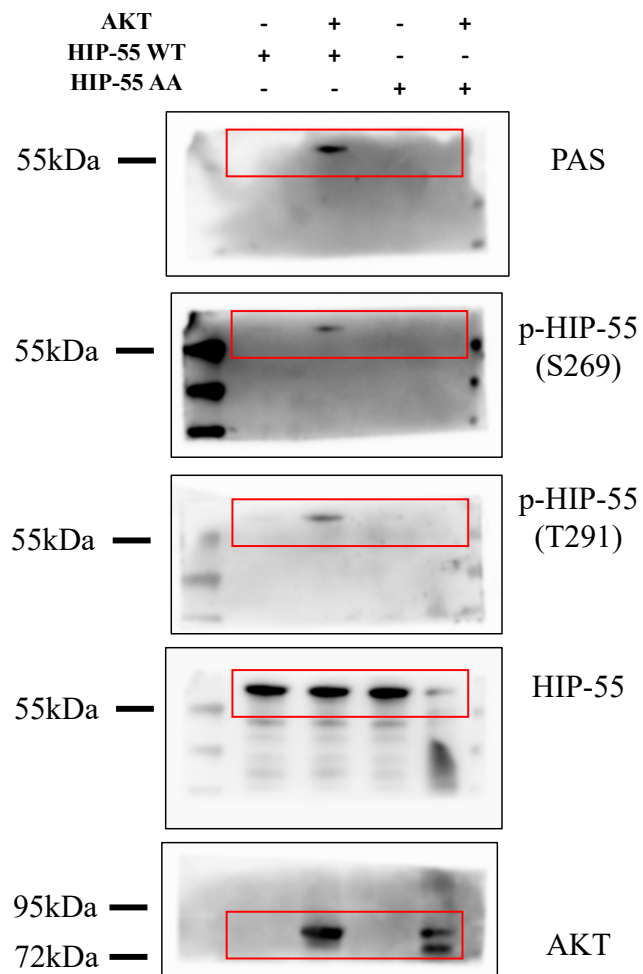

# Full unedited gel

Full unedited gel for Figure 5K

Representative

N=1

Flag Pull down

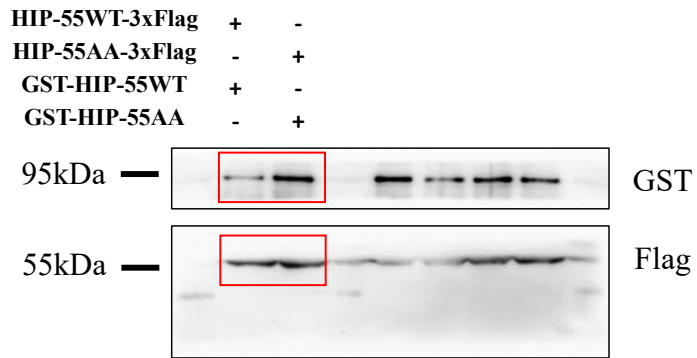

Input

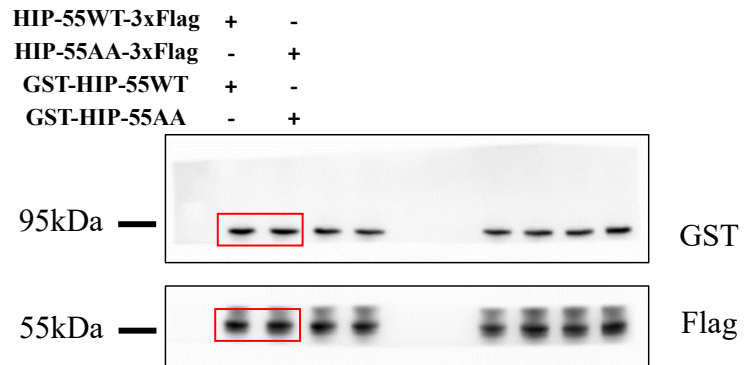

# Full unedited gel

Full unedited gel for Figure 5K

For quantification  
N=1

Flag Pull down

|                 |   |   |
|-----------------|---|---|
| HIP-55WT-3xFlag | + | - |
| HIP-55AA-3xFlag | - | + |
| GST-HIP-55WT    | + | - |
| GST-HIP-55AA    | - | + |

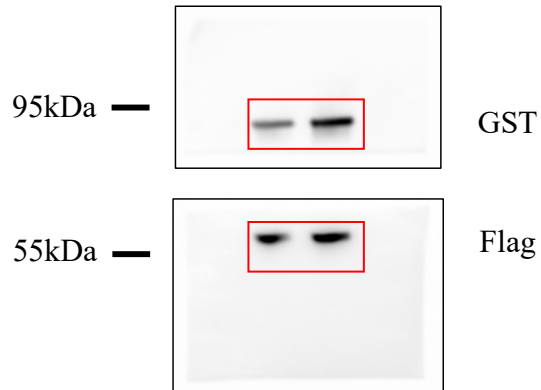

Input

|                 |   |   |
|-----------------|---|---|
| HIP-55WT-3xFlag | + | - |
| HIP-55AA-3xFlag | - | + |
| GST-HIP-55WT    | + | - |
| GST-HIP-55AA    | - | + |

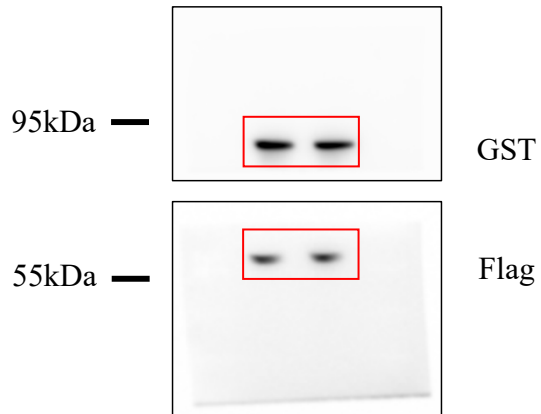

# Full unedited gel

Full unedited gel for Figure 5K

For quantification  
N=1

Flag Pull down

|                        |   |   |
|------------------------|---|---|
| <b>HIP-55WT-3xFlag</b> | + | - |
| <b>HIP-55AA-3xFlag</b> | - | + |
| <b>GST-HIP-55WT</b>    | + | - |
| <b>GST-HIP-55AA</b>    | - | + |

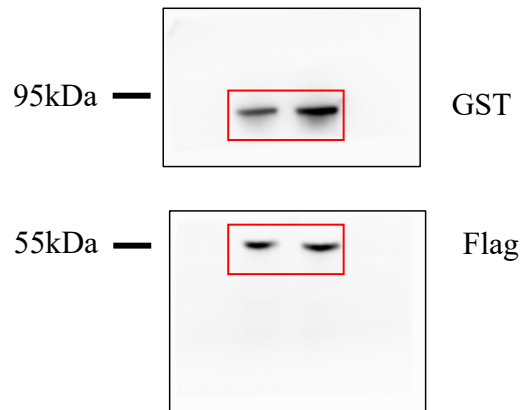

Input

|                        |   |   |
|------------------------|---|---|
| <b>HIP-55WT-3xFlag</b> | + | - |
| <b>HIP-55AA-3xFlag</b> | - | + |
| <b>GST-HIP-55WT</b>    | + | - |
| <b>GST-HIP-55AA</b>    | - | + |

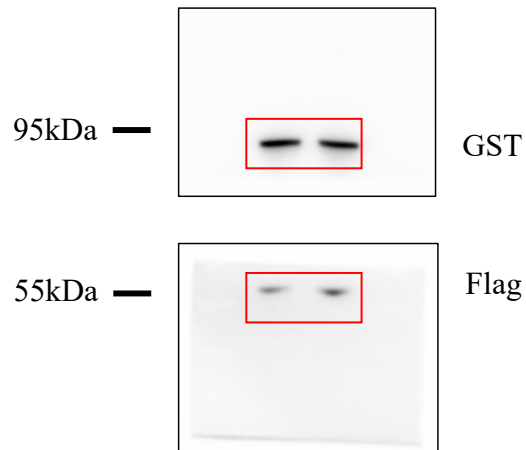

# Full unedited gel

Full unedited gel for Figure 5K

For quantification  
N=1

Flag Pull down

|                 |   |   |
|-----------------|---|---|
| HIP-55WT-3xFlag | + | - |
| HIP-55AA-3xFlag | - | + |
| GST-HIP-55WT    | + | - |
| GST-HIP-55AA    | - | + |

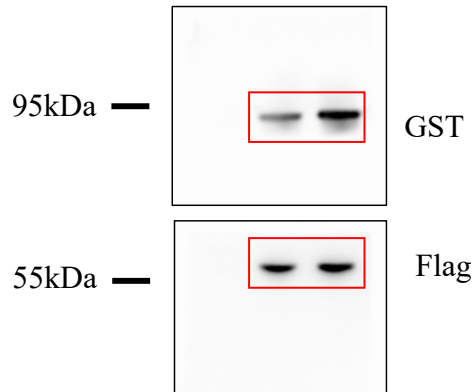

Input

|                 |   |   |
|-----------------|---|---|
| HIP-55WT-3xFlag | + | - |
| HIP-55AA-3xFlag | - | + |
| GST-HIP-55WT    | + | - |
| GST-HIP-55AA    | - | + |

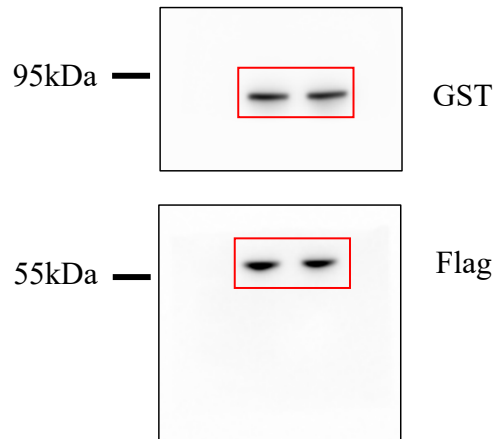

# Full unedited gel

Full unedited gel for Figure 5L

Representative

N=1

GST Pull down

|                 |   |   |
|-----------------|---|---|
| GST-HIP-55WT    | + | - |
| GST-HIP-55AA    | - | + |
| HIP-55WT-3xFlag | + | - |
| HIP-55AA-3xFlag | - | + |

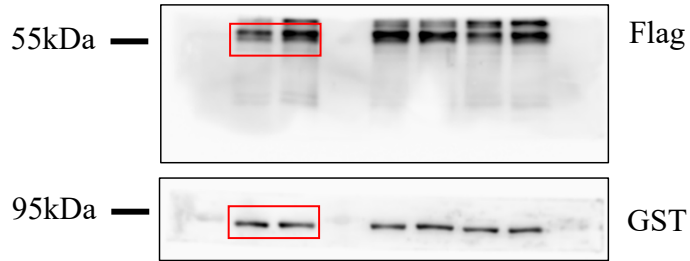

Input

|                 |   |   |
|-----------------|---|---|
| GST-HIP-55WT    | + | - |
| GST-HIP-55AA    | - | + |
| HIP-55WT-3xFlag | + | - |
| HIP-55AA-3xFlag | - | + |

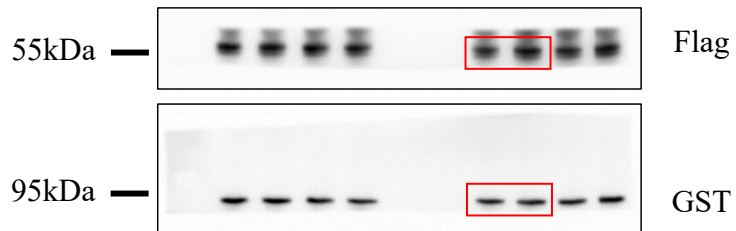



## Full unedited gel

Full unedited gel for Figure 5L

For quantification

N=1

GST Pull down

|                 |   |   |
|-----------------|---|---|
| GST-HIP-55WT    | + | - |
| GST-HIP-55AA    | - | + |
| HIP-55WT-3xFlag | + | - |
| HIP-55AA-3xFlag | - | + |

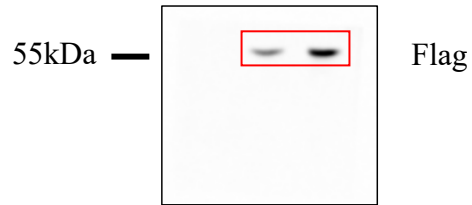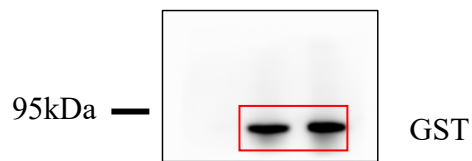

Input

|                 |   |   |
|-----------------|---|---|
| GST-HIP-55WT    | + | - |
| GST-HIP-55AA    | - | + |
| HIP-55WT-3xFlag | + | - |
| HIP-55AA-3xFlag | - | + |

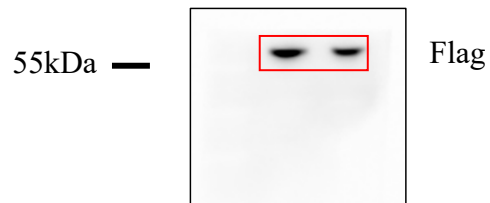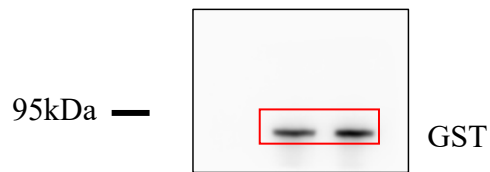

# Full unedited gel

Full unedited gel for Figure 5L

For quantification

N=1

GST Pull down

|                        |          |          |
|------------------------|----------|----------|
| <b>GST-HIP-55WT</b>    | <b>+</b> | <b>-</b> |
| <b>GST-HIP-55AA</b>    | <b>-</b> | <b>+</b> |
| <b>HIP-55WT-3xFlag</b> | <b>+</b> | <b>-</b> |
| <b>HIP-55AA-3xFlag</b> | <b>-</b> | <b>+</b> |

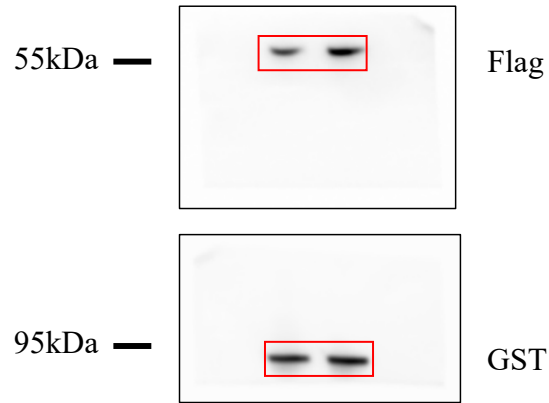

Input

|                        |          |          |
|------------------------|----------|----------|
| <b>GST-HIP-55WT</b>    | <b>+</b> | <b>-</b> |
| <b>GST-HIP-55AA</b>    | <b>-</b> | <b>+</b> |
| <b>HIP-55WT-3xFlag</b> | <b>+</b> | <b>-</b> |
| <b>HIP-55AA-3xFlag</b> | <b>-</b> | <b>+</b> |

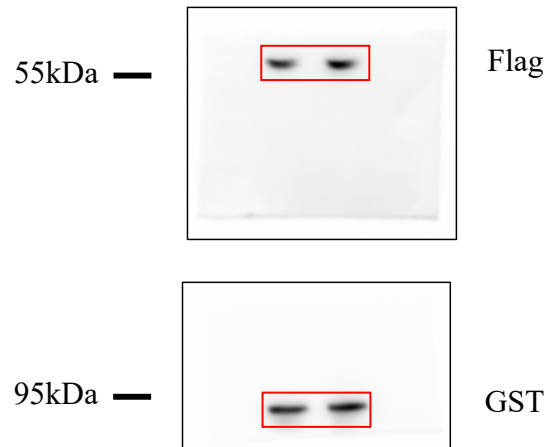

# Full unedited gel

Full unedited gel for Figure 5L

For quantification

N=1

## GST Pull down

|                        |          |          |
|------------------------|----------|----------|
| <b>GST-HIP-55WT</b>    | <b>+</b> | <b>-</b> |
| <b>GST-HIP-55AA</b>    | <b>-</b> | <b>+</b> |
| <b>HIP-55WT-3xFlag</b> | <b>+</b> | <b>-</b> |
| <b>HIP-55AA-3xFlag</b> | <b>-</b> | <b>+</b> |

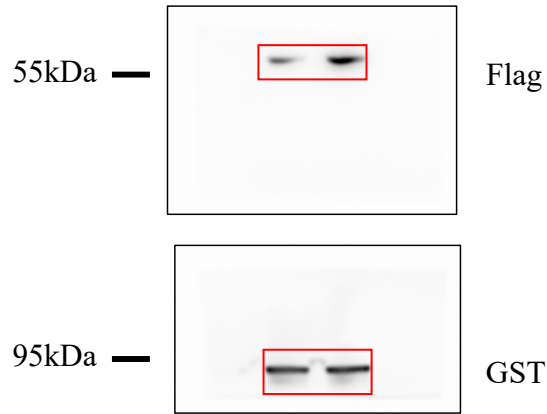

## Input

|                        |          |          |
|------------------------|----------|----------|
| <b>GST-HIP-55WT</b>    | <b>+</b> | <b>-</b> |
| <b>GST-HIP-55AA</b>    | <b>-</b> | <b>+</b> |
| <b>HIP-55WT-3xFlag</b> | <b>+</b> | <b>-</b> |
| <b>HIP-55AA-3xFlag</b> | <b>-</b> | <b>+</b> |

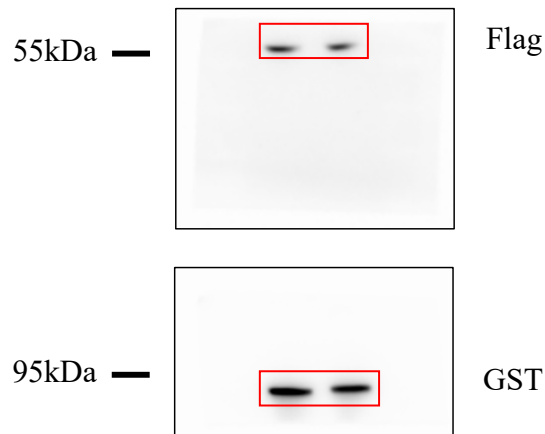

### Full unedited gel

Full unedited gel for Figure 6A

Representative

N=1

ISO (10 $\mu$ M) - +

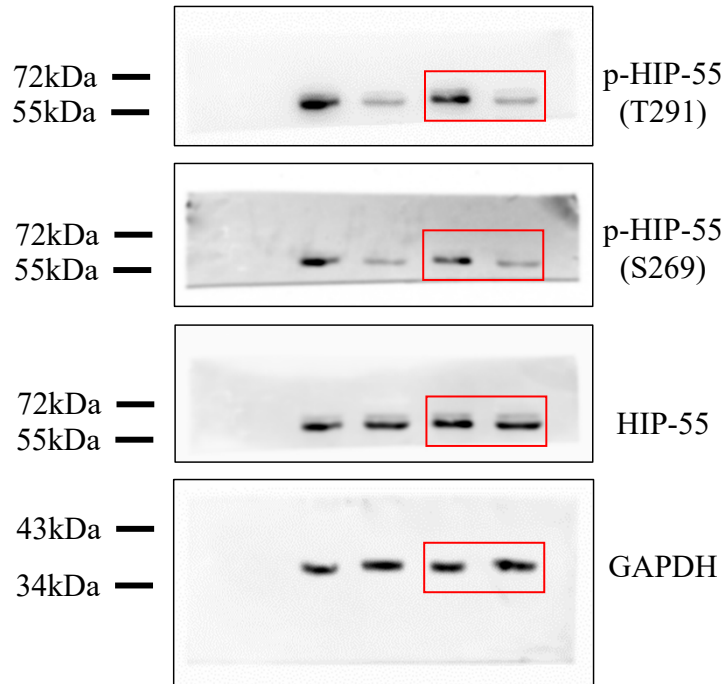

Full unedited gel for Figure 6A

For quantification

N=1

ISO (10 $\mu$ M) - +

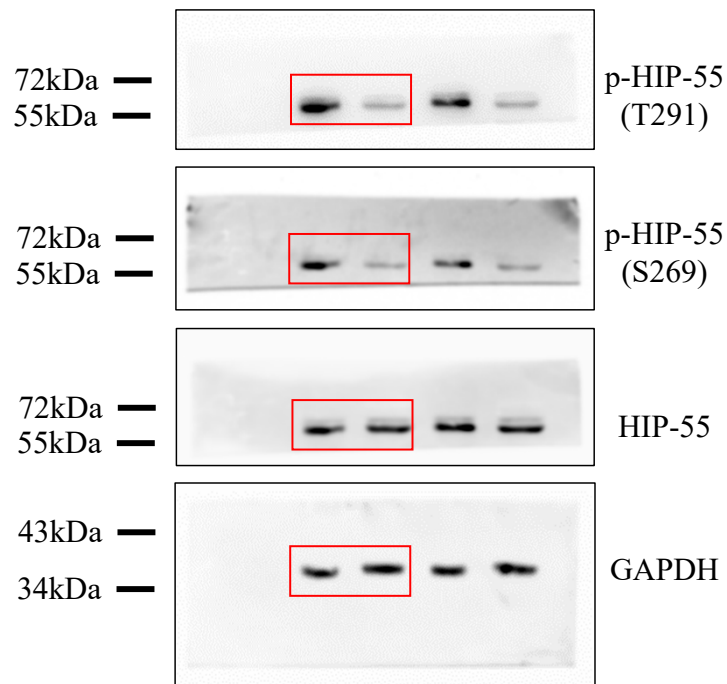

### Full unedited gel

Full unedited gel for Figure 6A

For quantification

N=2

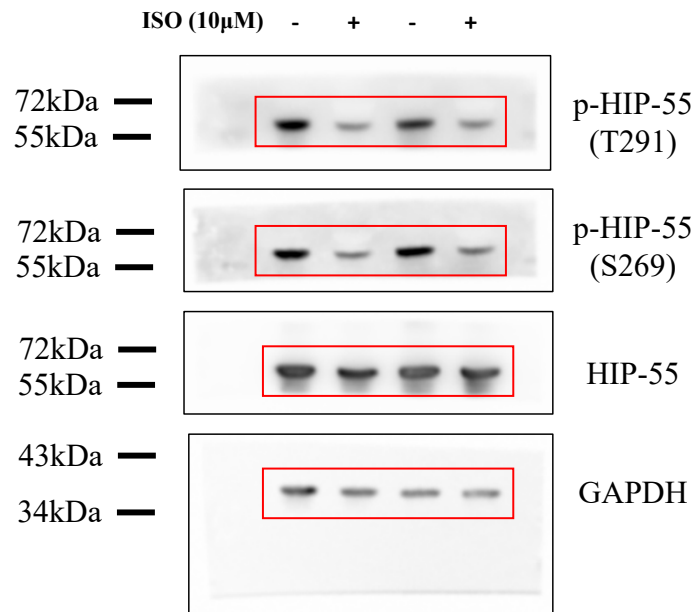

Full unedited gel for Figure 6A

For quantification

N=1

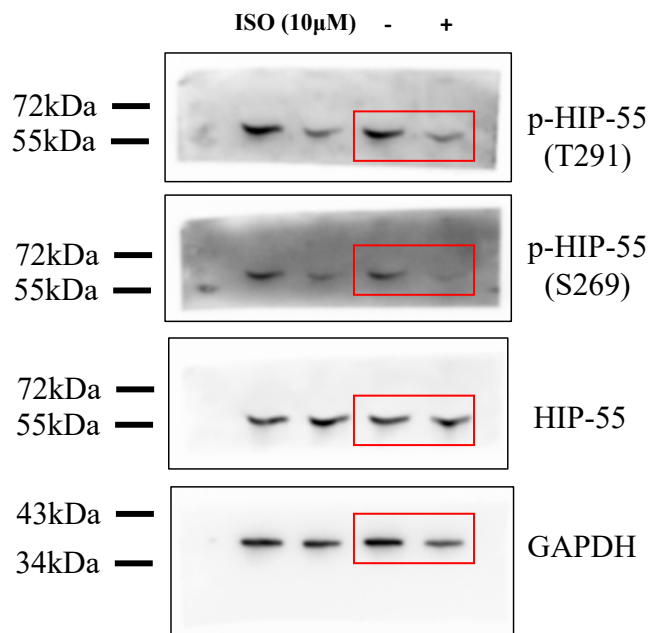

### Full unedited gel

Full unedited gel for Figure 6E

Representative

N=1

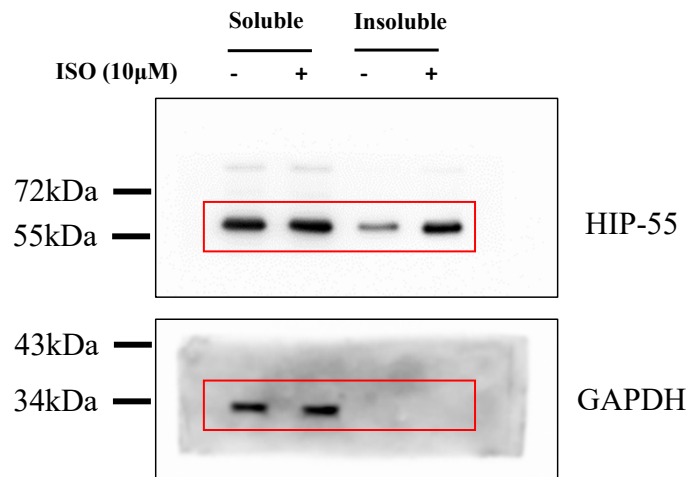

Full unedited gel for Figure 6E

For quantification

N=1

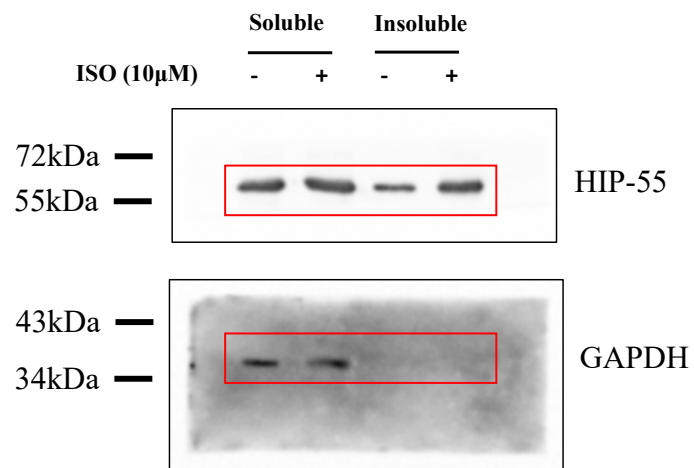

### Full unedited gel

Full unedited gel for Figure 6E

For quantification

N=1

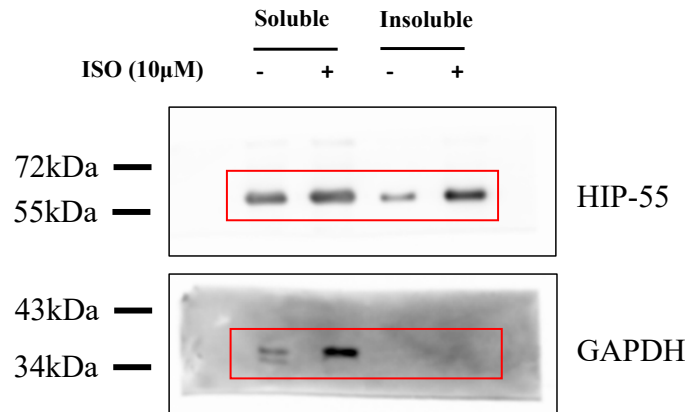

Full unedited gel for Figure 6E

For quantification

N=2

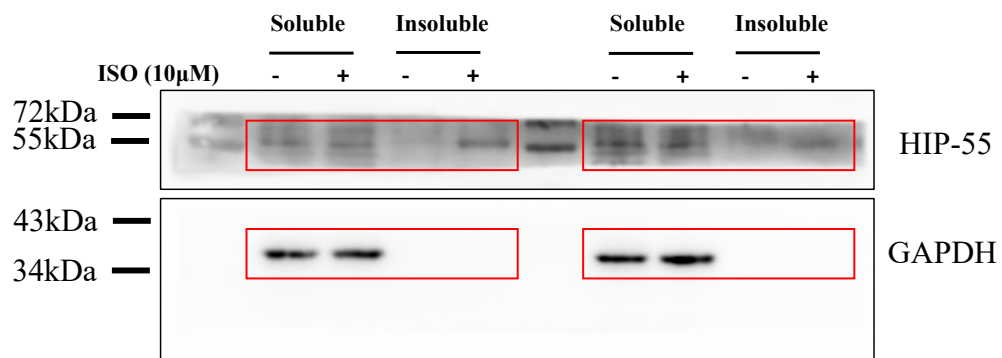

# Full unedited gel

Full unedited gel for Figure 6F

Representative  
N=2

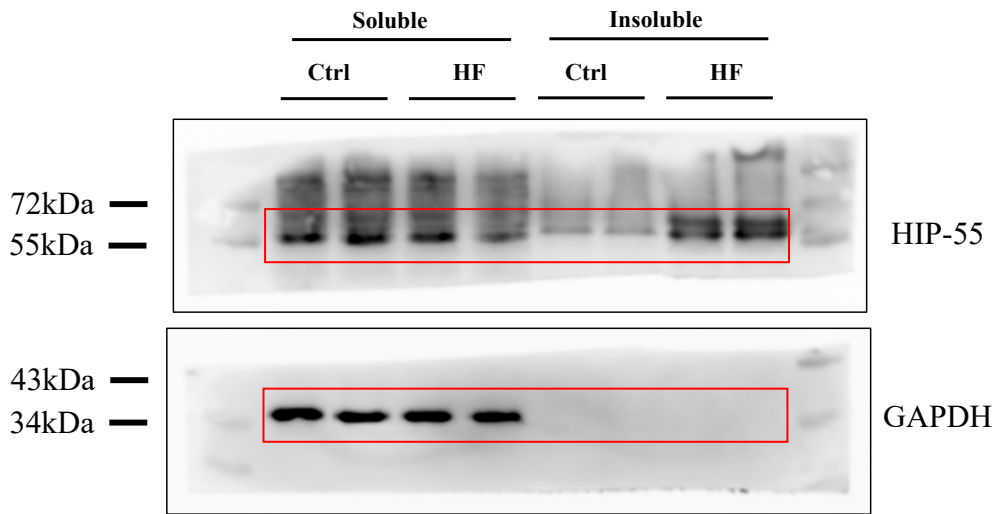

Full unedited gel for Figure 6F

For quantification  
N=2

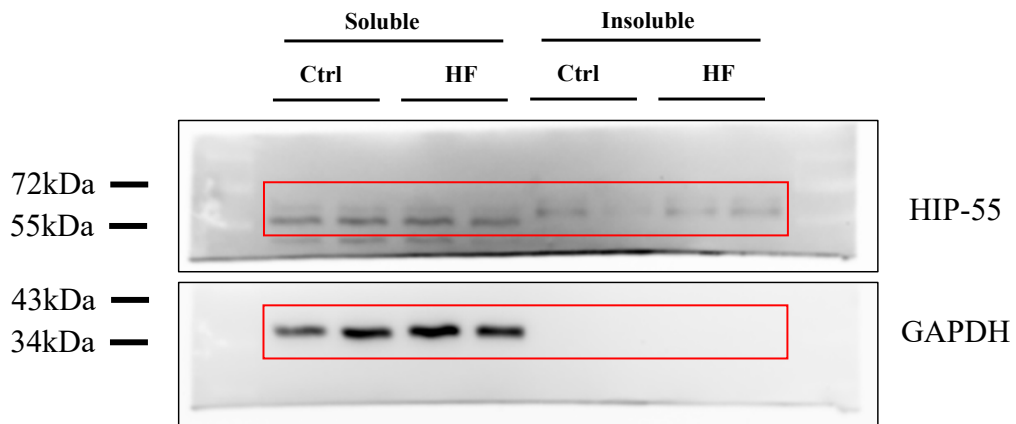



# Full unedited gel

Full unedited gel for Figure 6F

For quantification

N=2

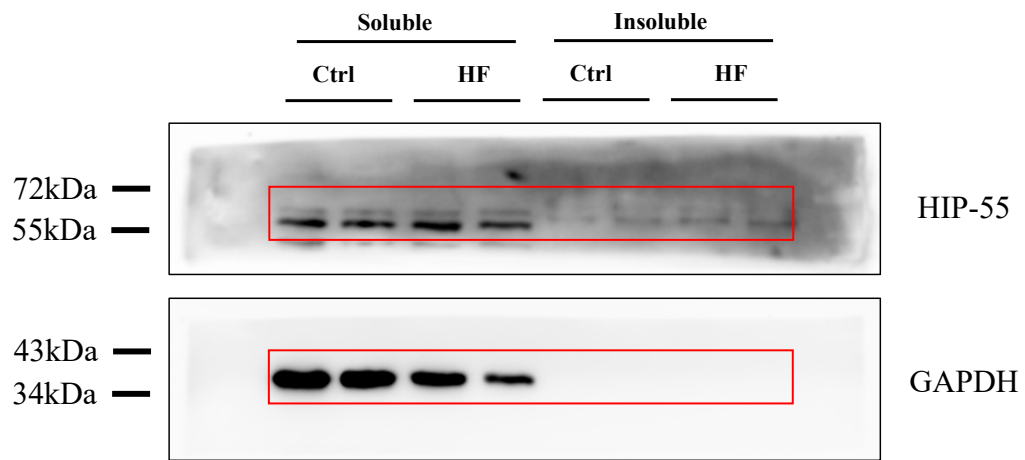

# Full unedited gel

Full unedited gel for Figure 6G

Representative

N=1

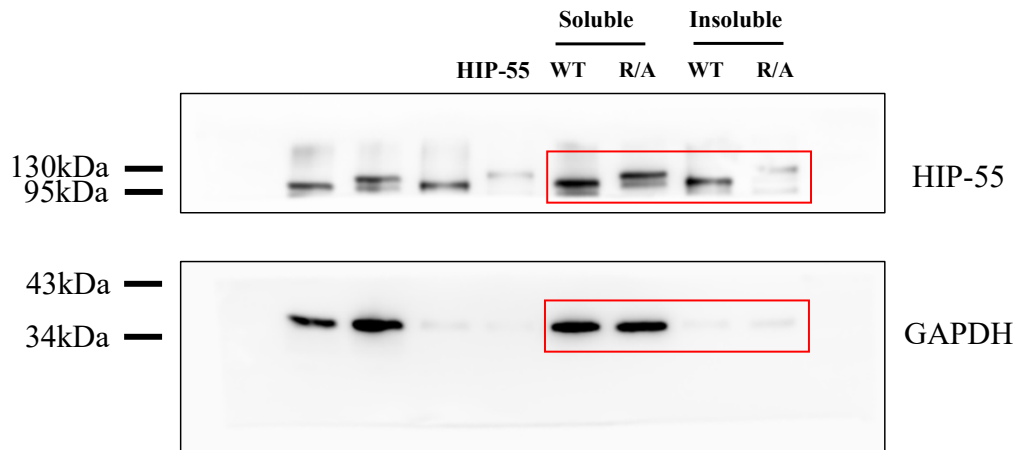

Full unedited gel for Figure 6G

For quantification

N=1

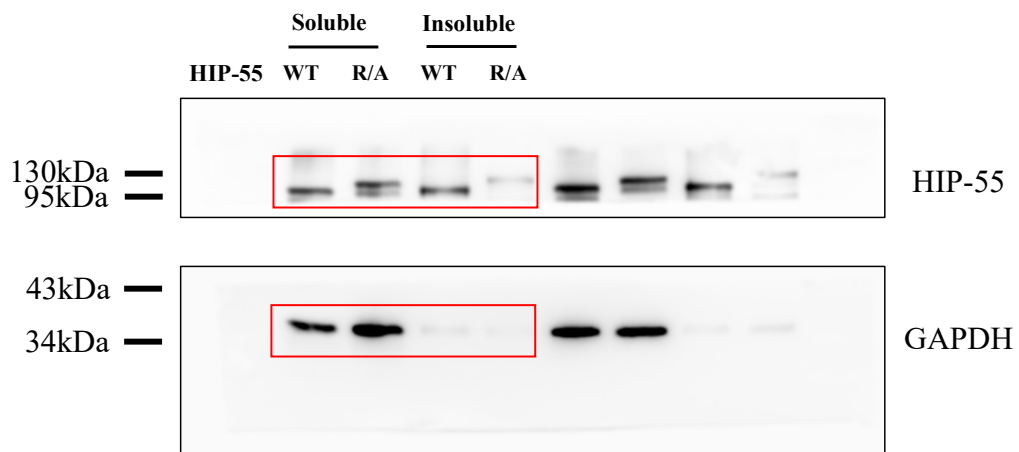

# Full unedited gel

Full unedited gel for Figure 6G

For quantification

N=1

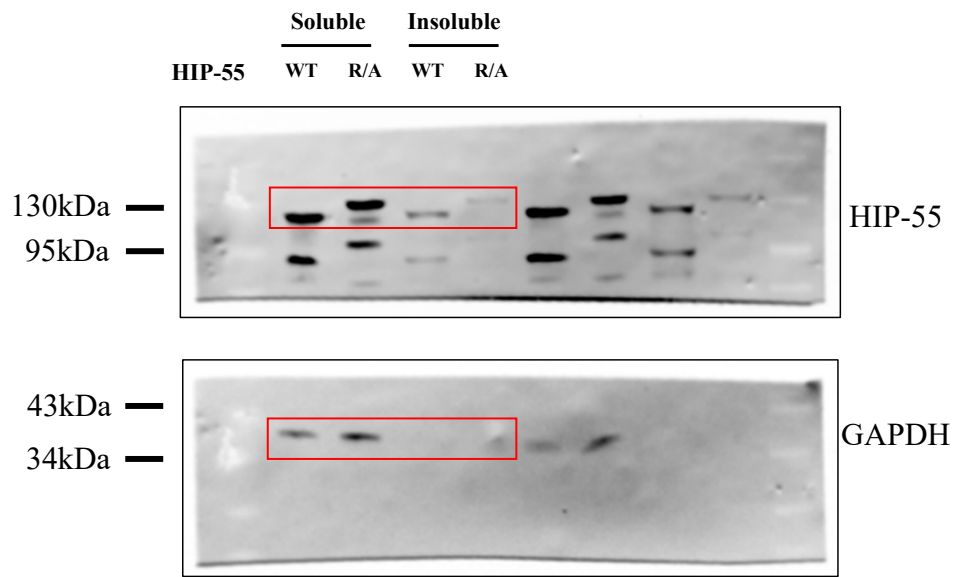

Full unedited gel for Figure 6G

For quantification

N=1

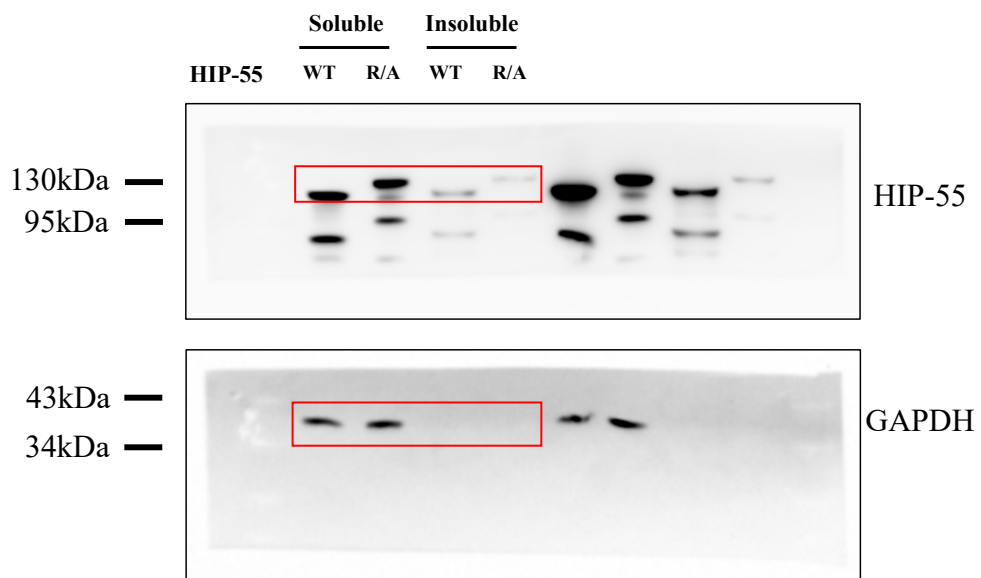

# Full unedited gel

Full unedited gel for Figure 6G

For quantification

N=1

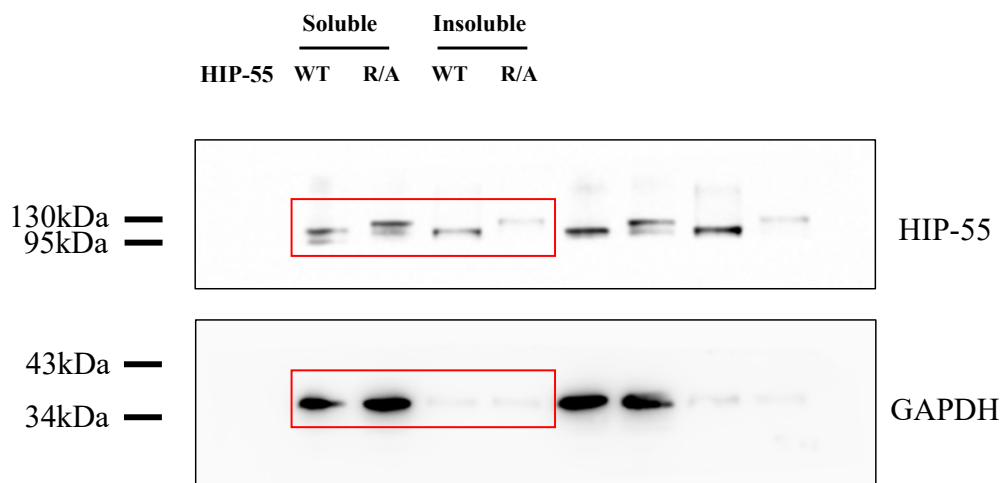

## Full unedited gel

Full unedited gel for Figure 6H

Representative

N=1

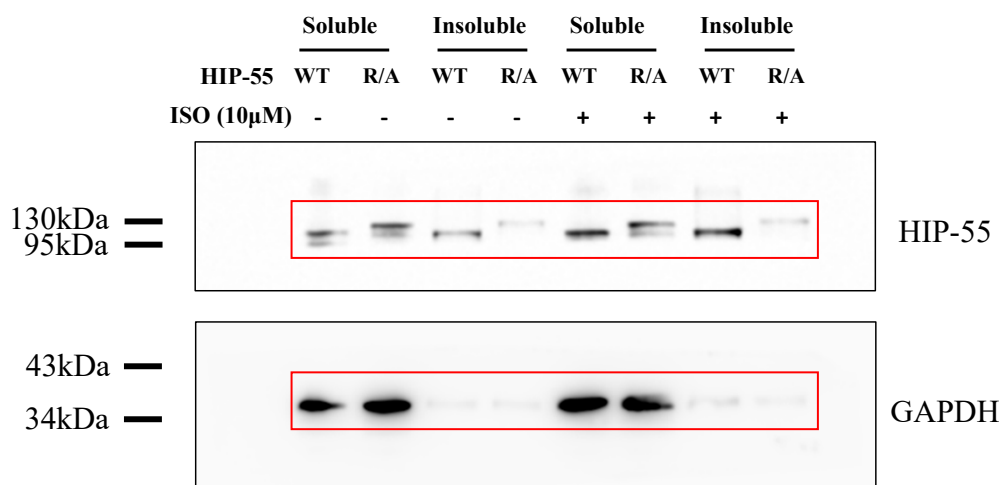

Full unedited gel for Figure 6H

For quantification

N=1

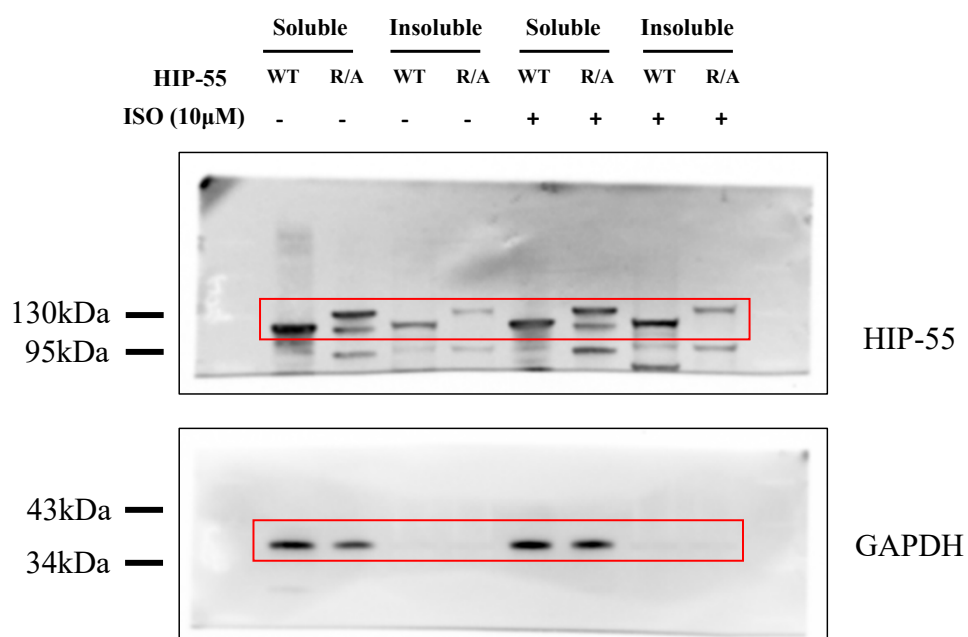

### Full unedited gel

Full unedited gel for Figure 6H

For quantification

N=1

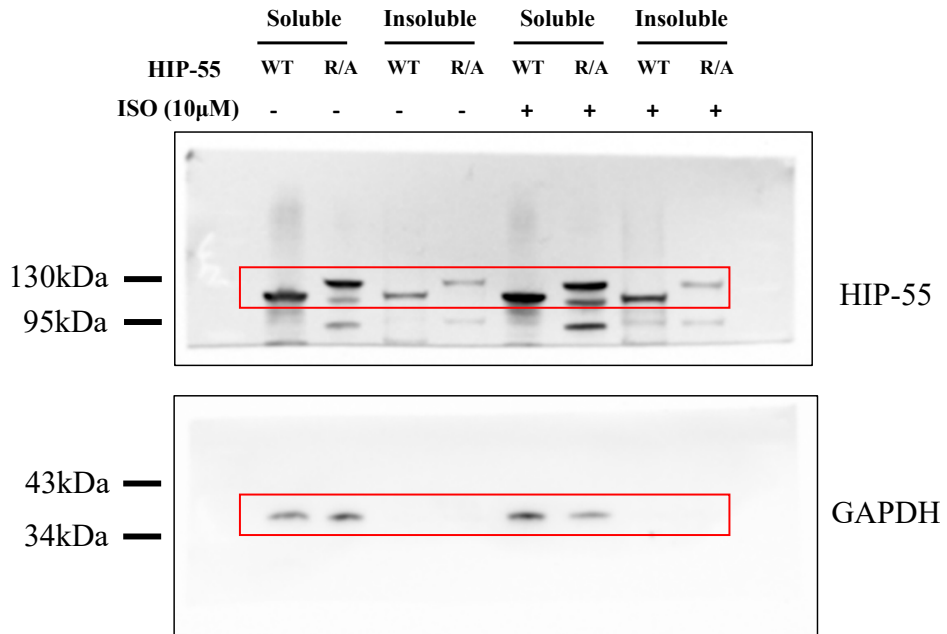

Full unedited gel for Figure 6H

For quantification

N=1

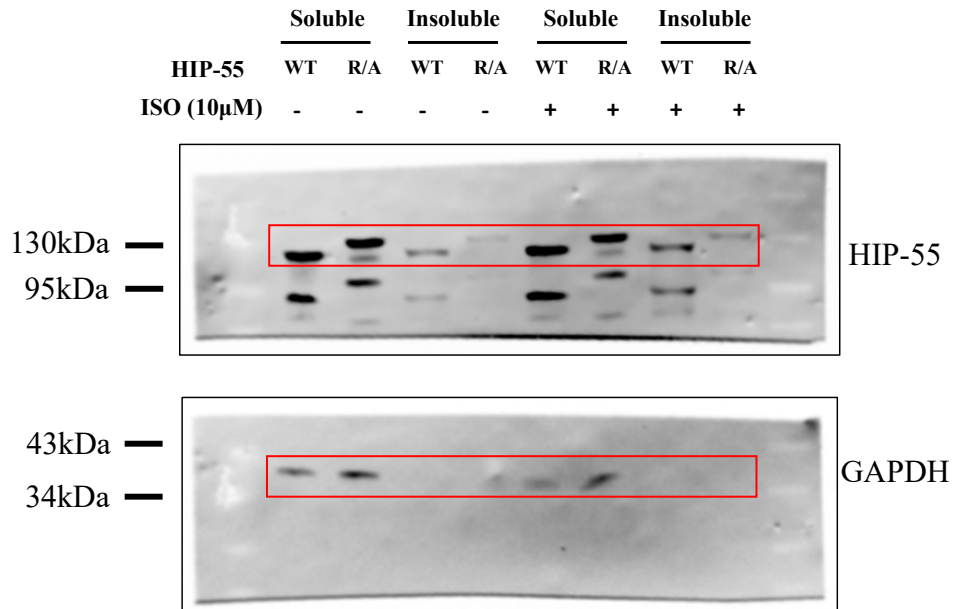

# Full unedited gel

Full unedited gel for Figure 6H

For quantification

N=1

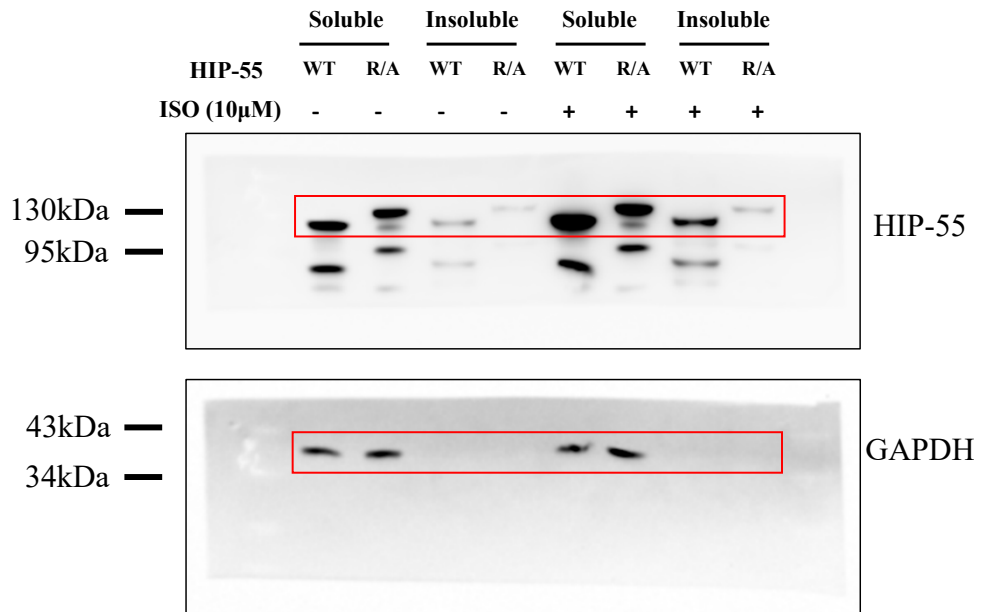

# Full unedited gel

Full unedited gel for Figure 6I

Representative  
N=1

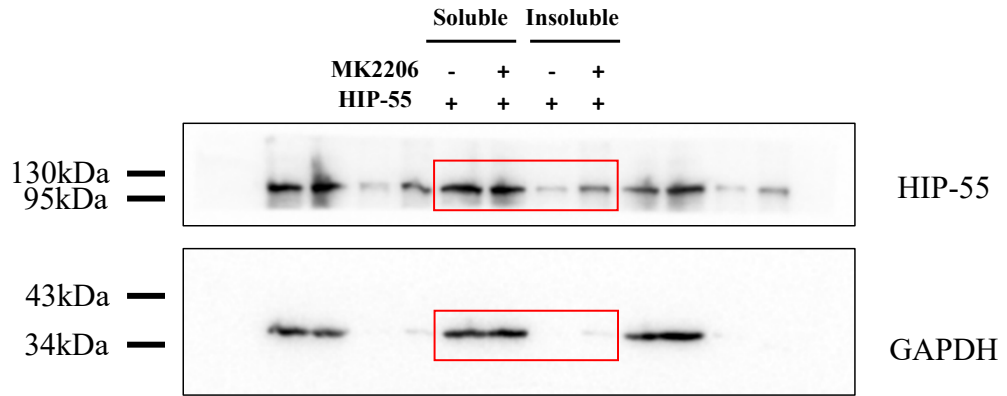

Full unedited gel for Figure 6I

For quantification  
N=2

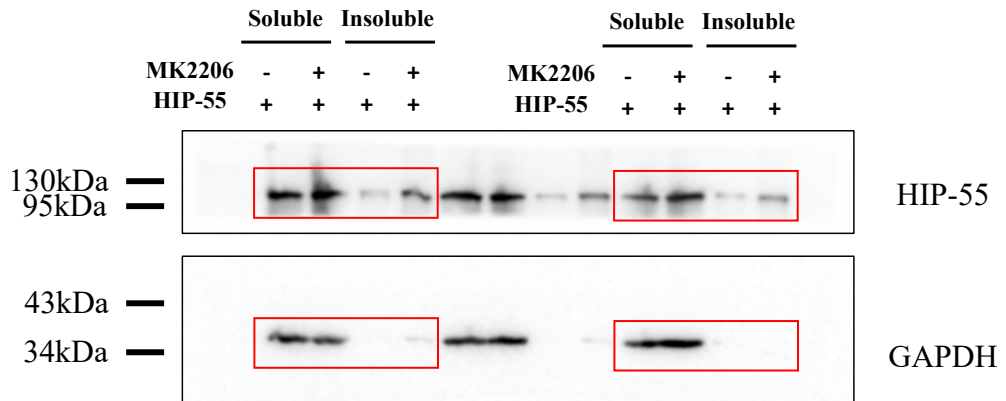



# Full unedited gel

Full unedited gel for Figure 6I

For quantification  
N=2

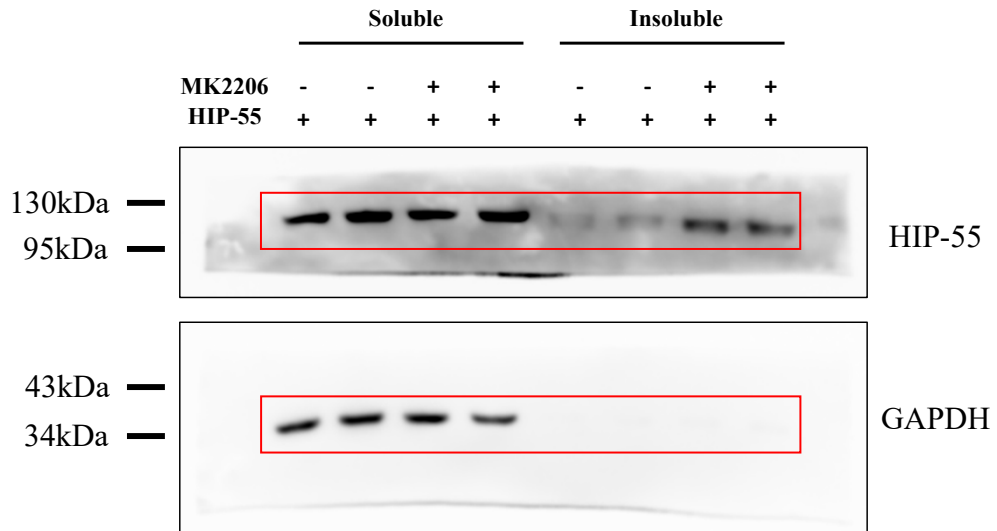

Full unedited gel for Figure 6I

For quantification  
N=2

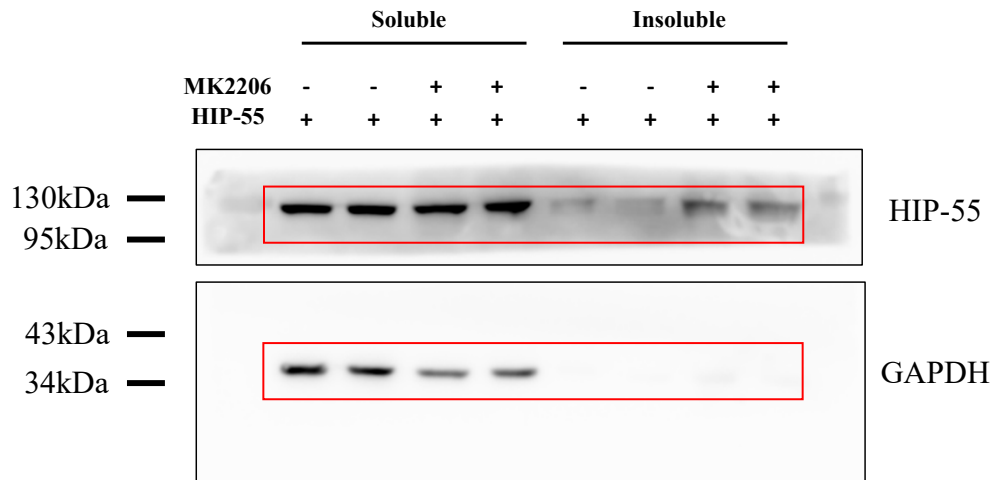

# Full unedited gel

Full unedited gel for Figure 6J

Representative  
N=1

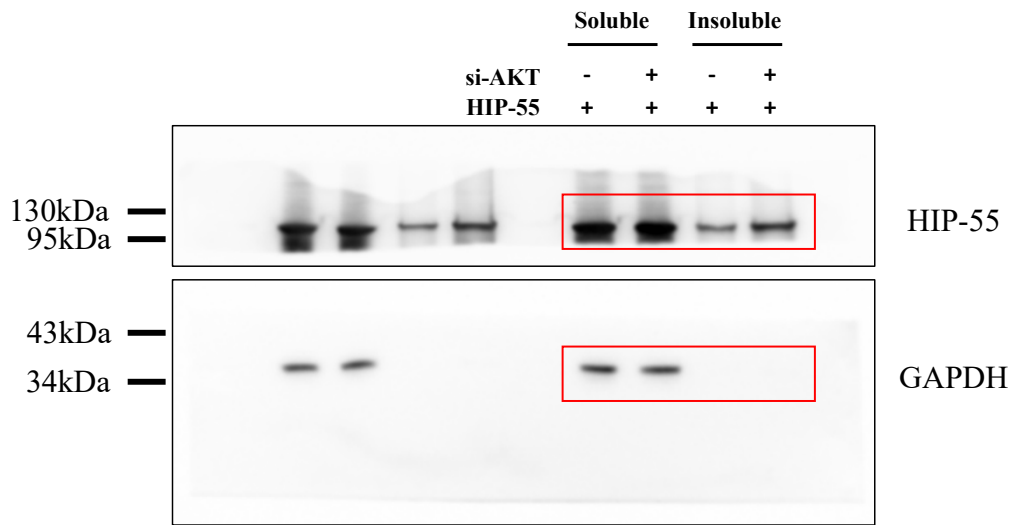

Full unedited gel for Figure 6J

For quantification  
N=1

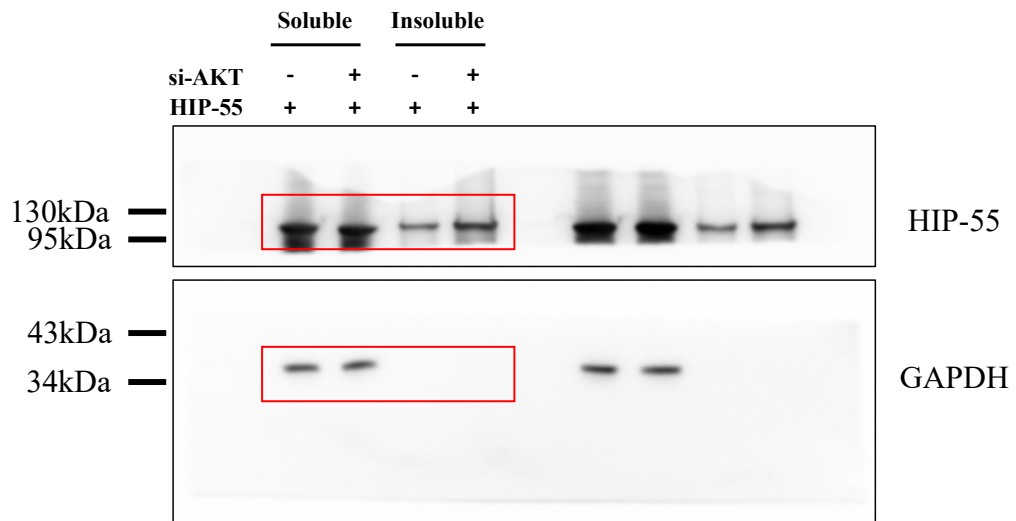

## Full unedited gel

Full unedited gel for Figure 6J

For quantification  
N=2

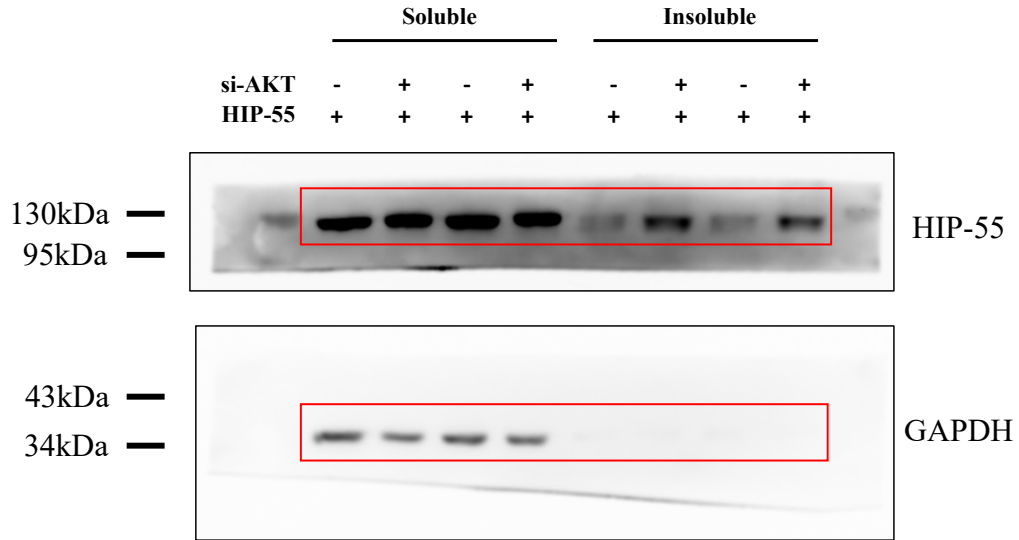

Full unedited gel for Figure 6J

For quantification  
N=3

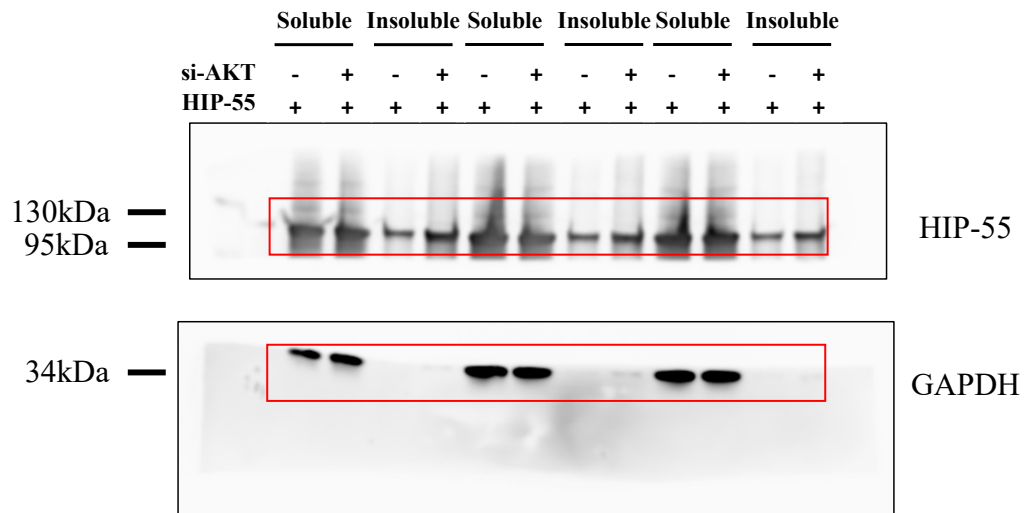

# Full unedited gel

Full unedited gel for Figure 6K

Representative

N=1

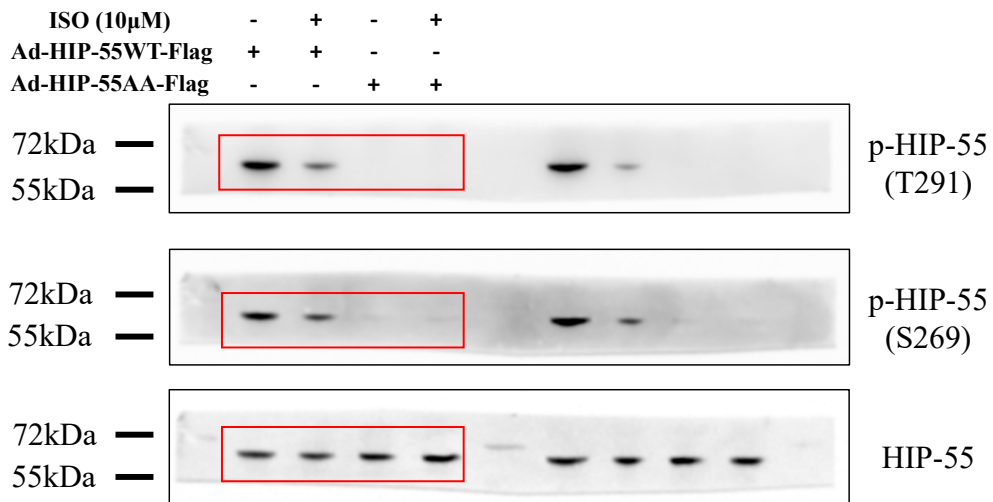

Full unedited gel for Figure 6K

For quantification

N=1

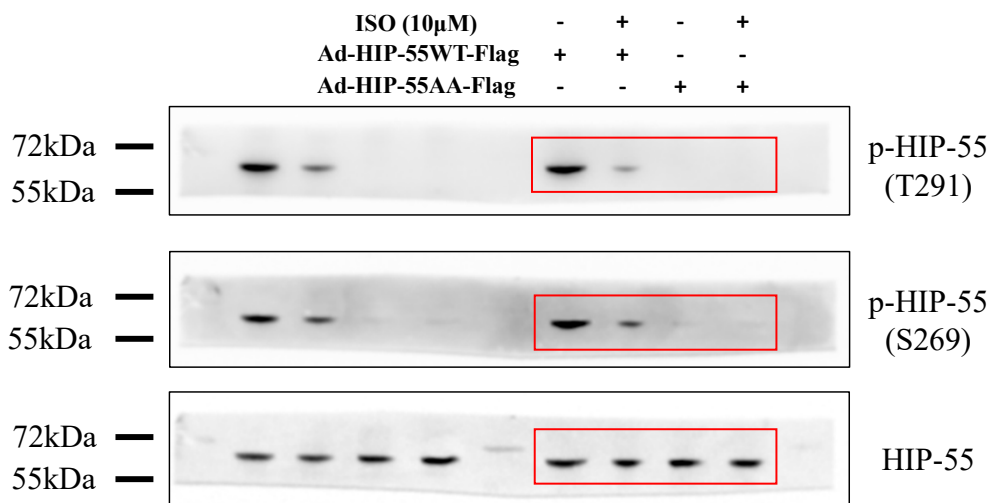

# Full unedited gel

Full unedited gel for Figure 6K

For quantification

N=1

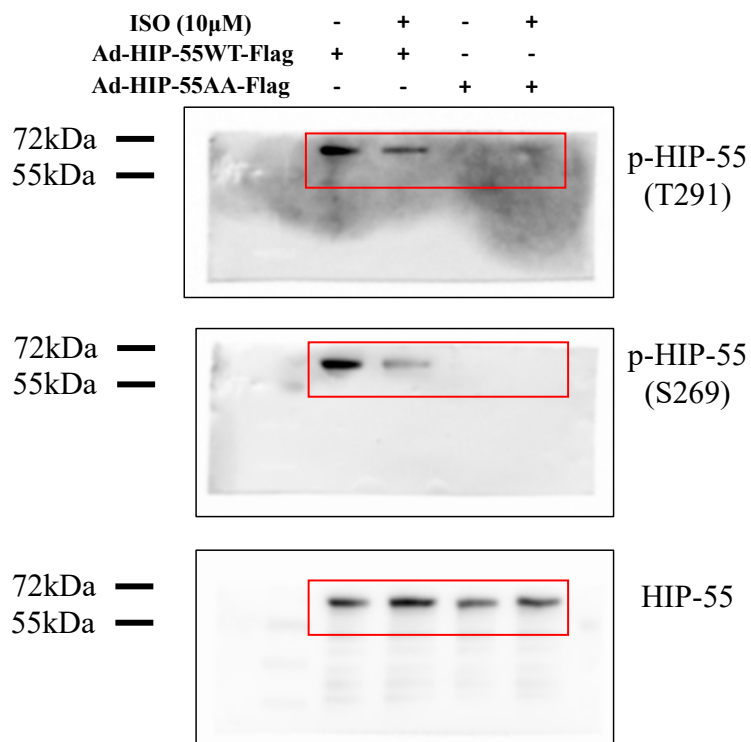

Full unedited gel for Figure 6K

For quantification

N=1

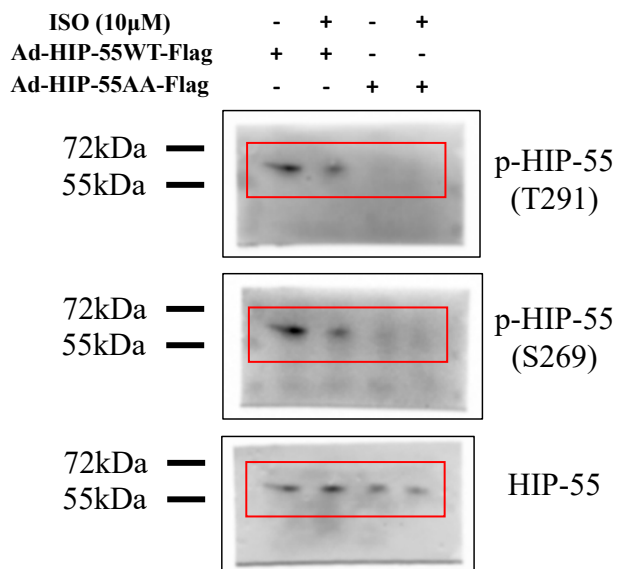

# Full unedited gel

Full unedited gel for Figure 6K

For quantification

N=1

|                  |   |   |   |   |
|------------------|---|---|---|---|
| ISO (10 $\mu$ M) | - | + | - | + |
| Ad-HIP-55WT-Flag | + | + | - | - |
| Ad-HIP-55AA-Flag | - | - | + | + |

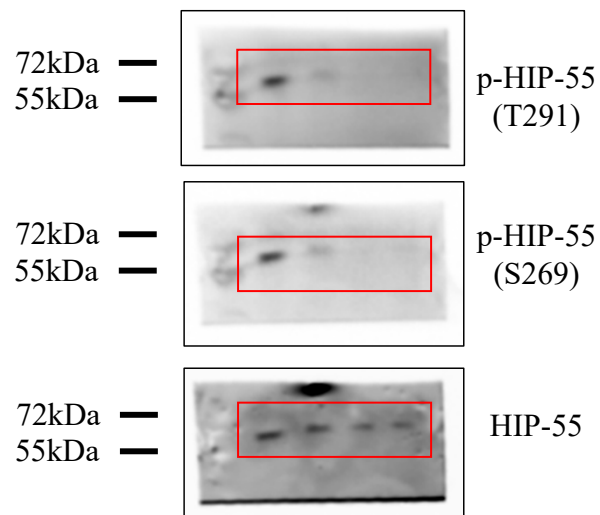

### Full unedited gel

Full unedited gel for Figure 6M

Representative

N=1

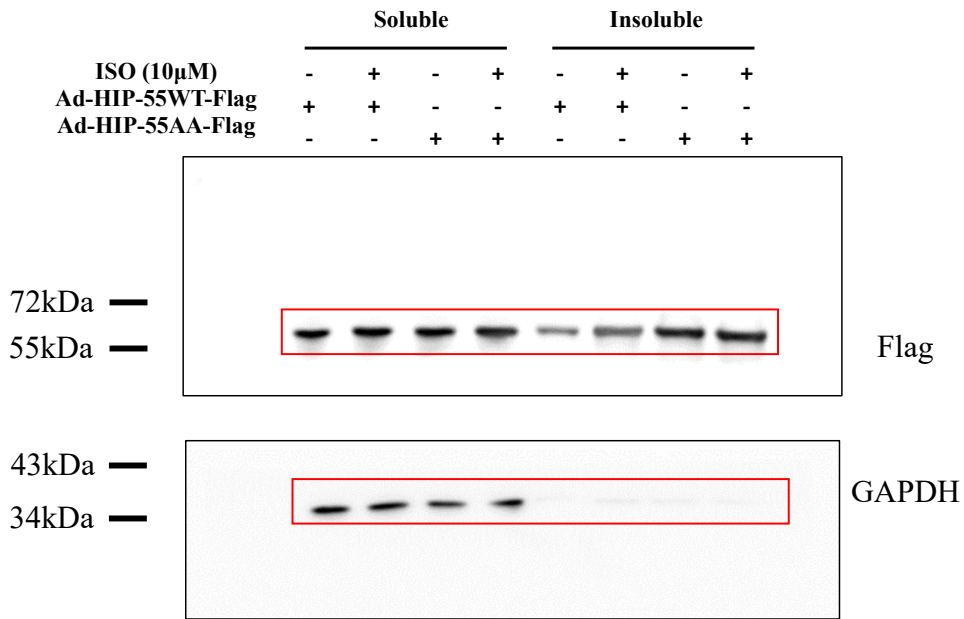

Full unedited gel for Figure 6M

For quantification

N=1

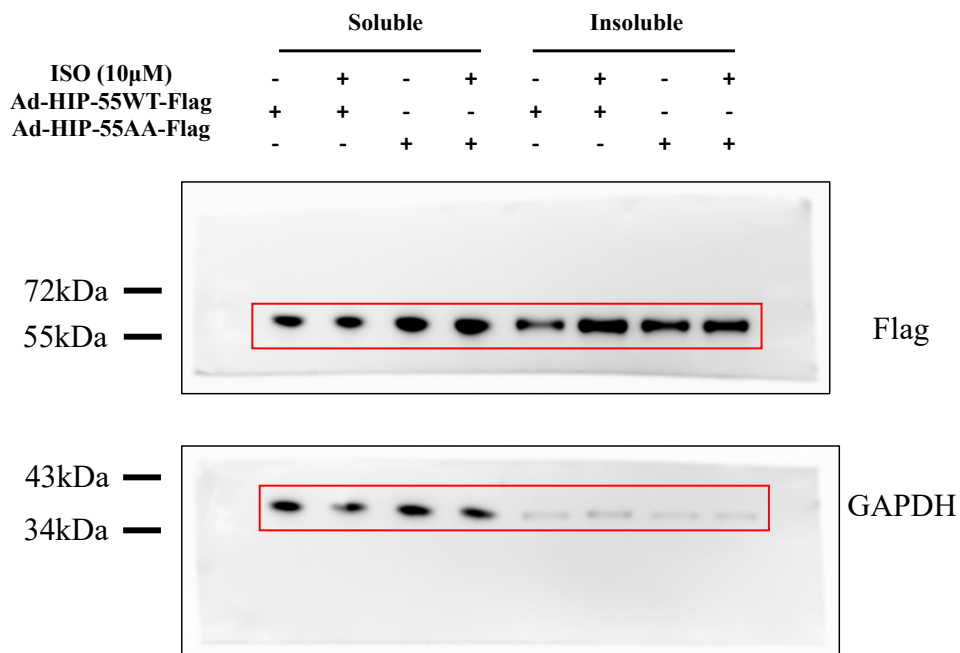

### Full unedited gel

Full unedited gel for Figure 6M

For quantification

N=1

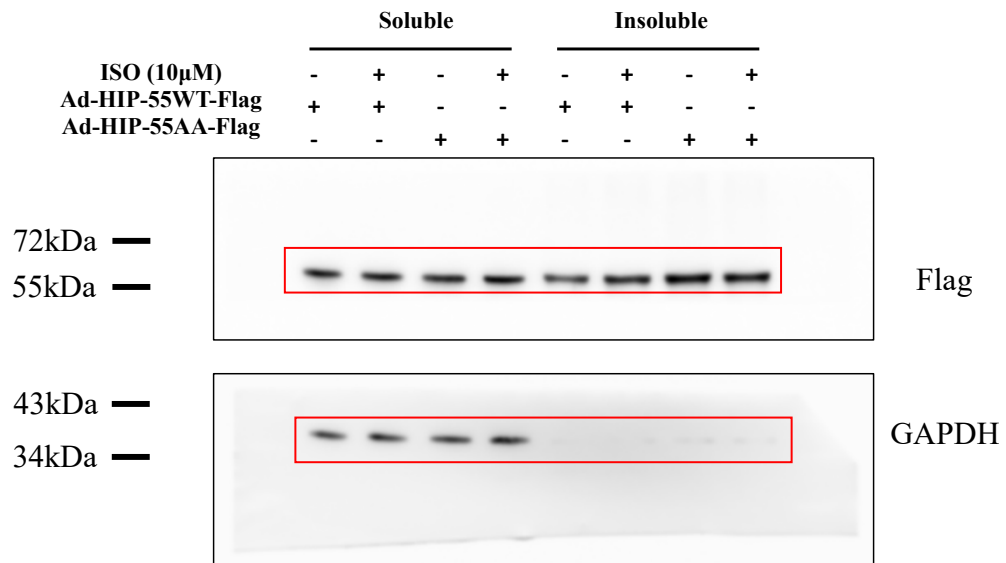

Full unedited gel for Figure 6M

For quantification

N=1

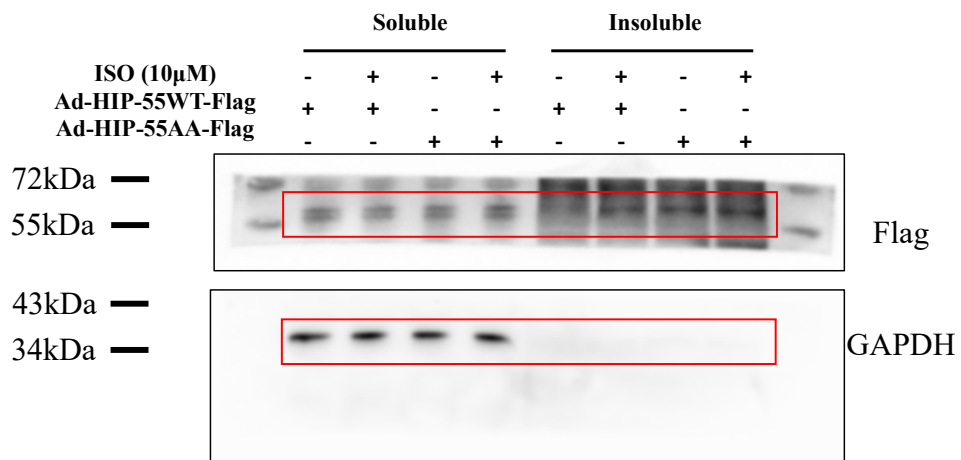



# Full unedited gel

Full unedited gel for Figure 6M

For quantification

N=1

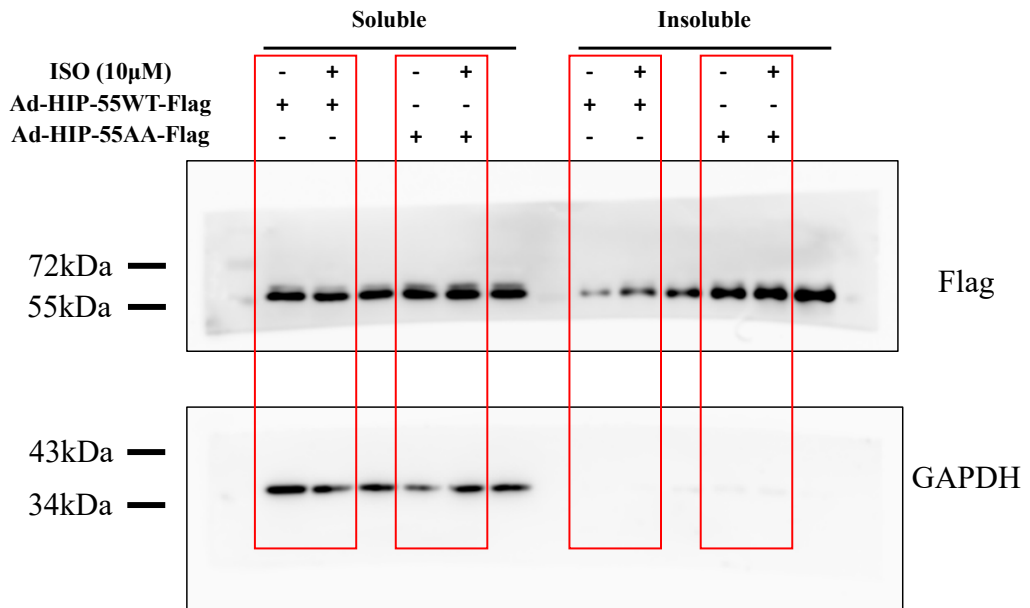

# Full unedited gel

Full unedited gel for Figure 7A

Representative

N=1

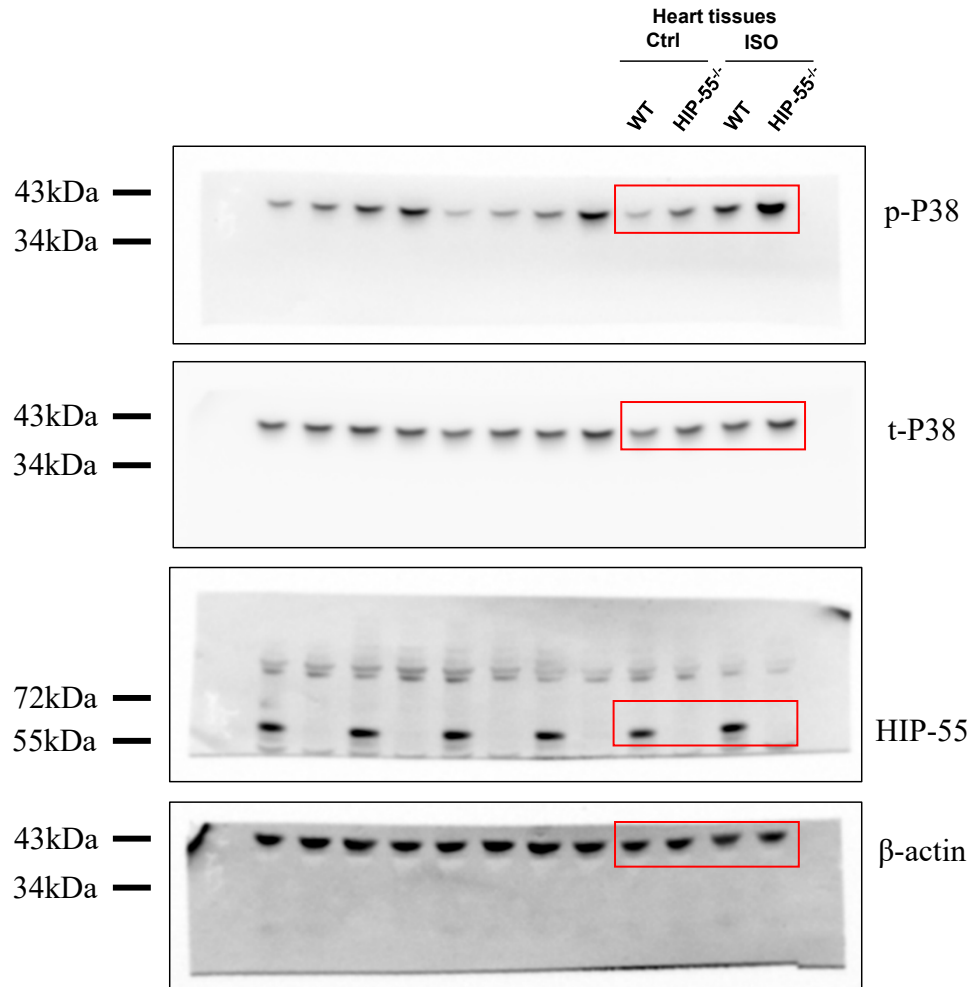

# Full unedited gel

Full unedited gel for Figure 7A

For quantification

N=2

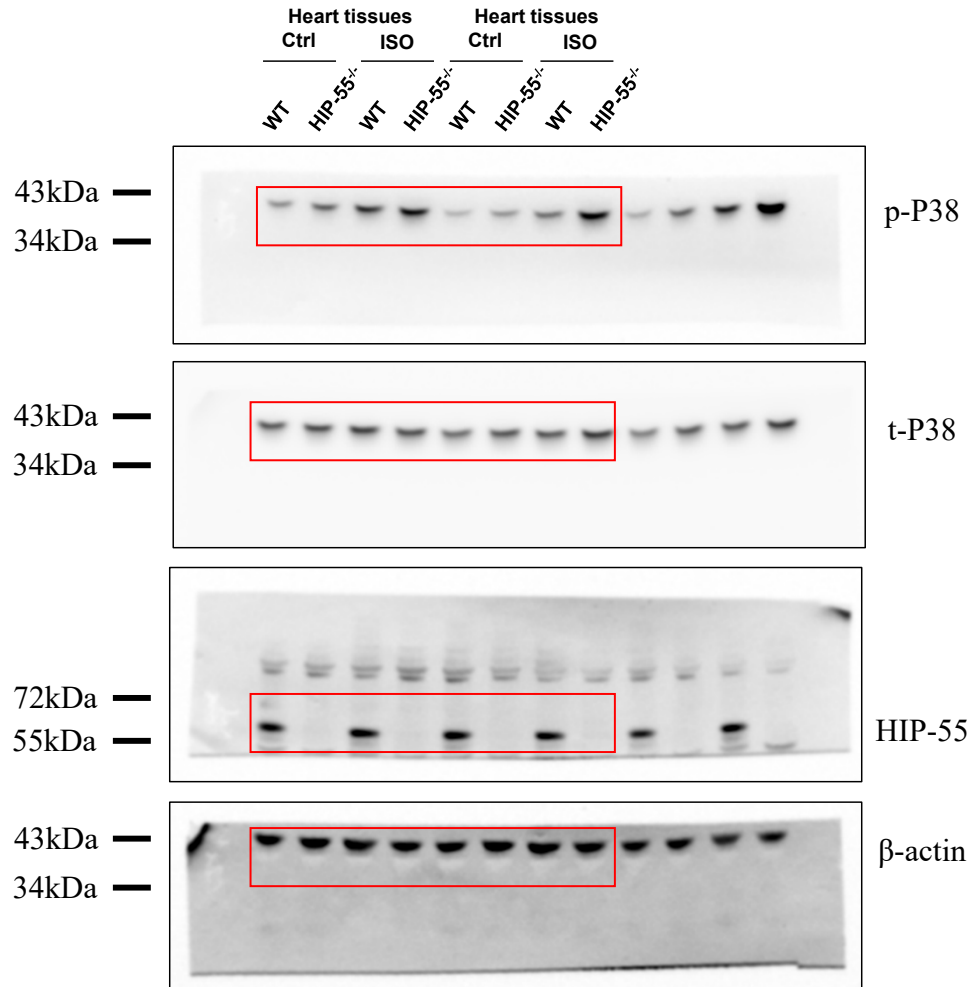

# Full unedited gel

Full unedited gel for Figure 7A

For quantification

N=1

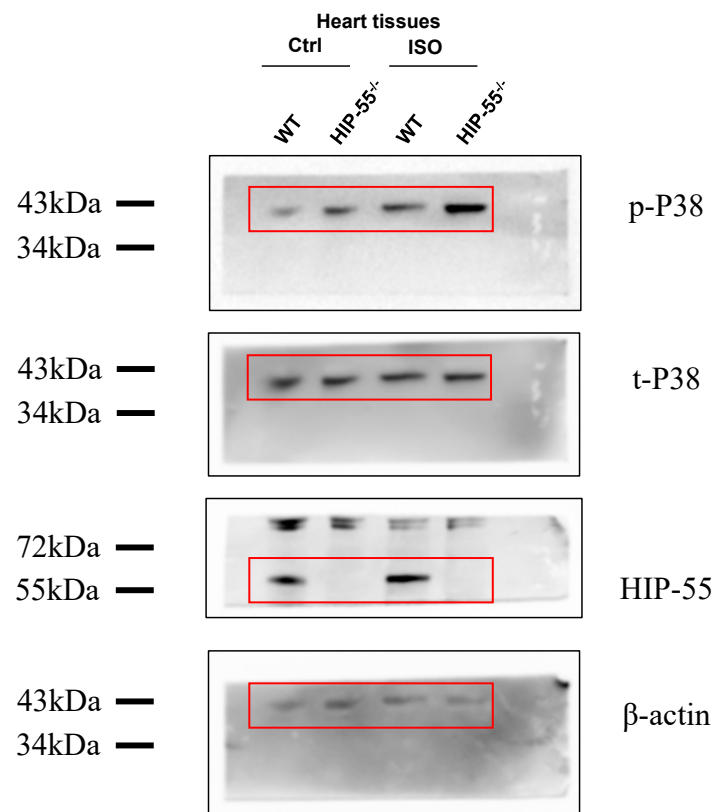

# Full unedited gel

Full unedited gel for Figure 7A

For quantification

N=2

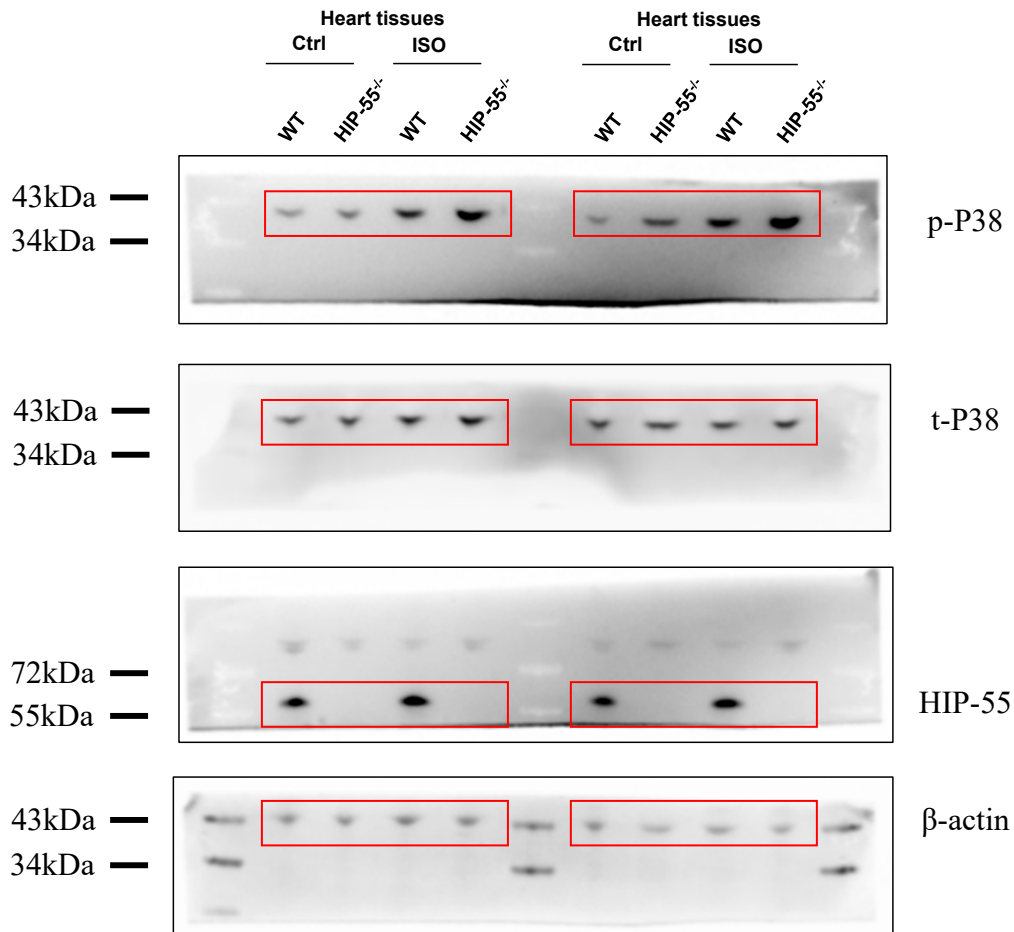

# Full unedited gel

Full unedited gel for Figure 7B

Representative  
N=1

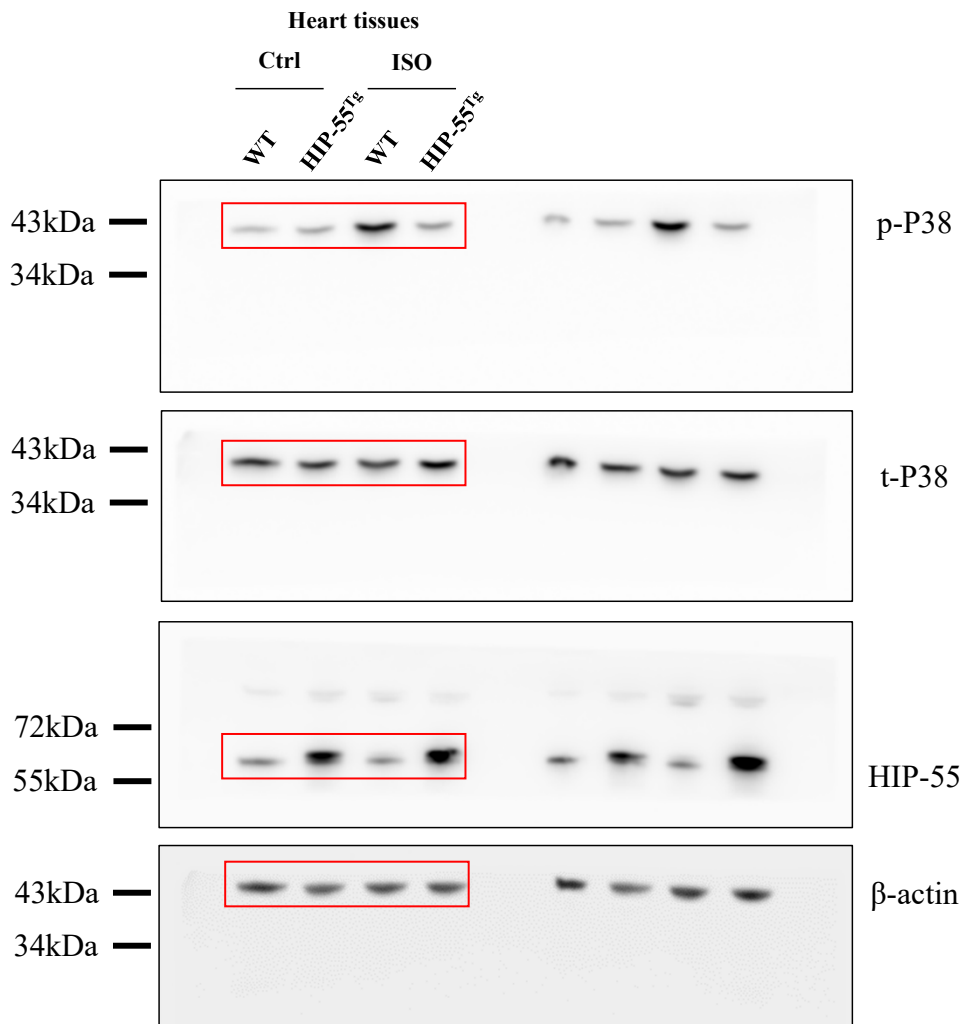



# Full unedited gel

Full unedited gel for Figure 7B

For quantification

N=2

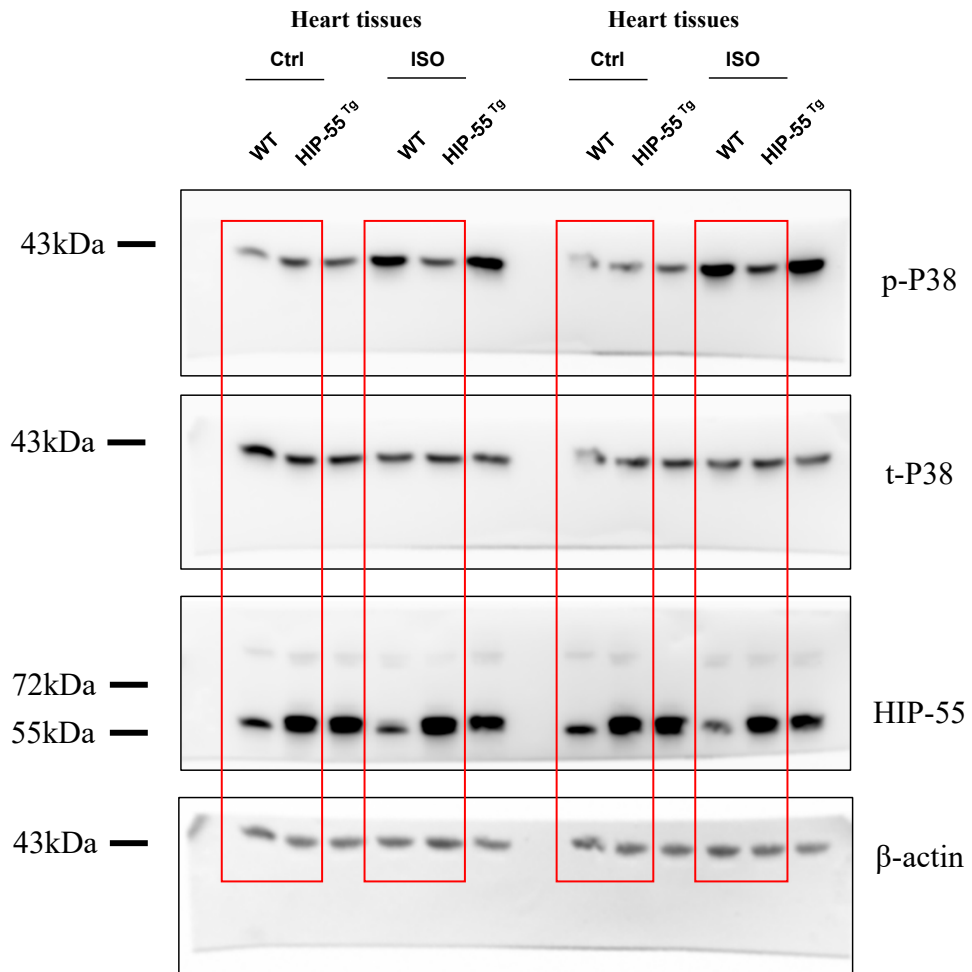



# Full unedited gel

Full unedited gel for Figure 7B

For quantification  
N=1

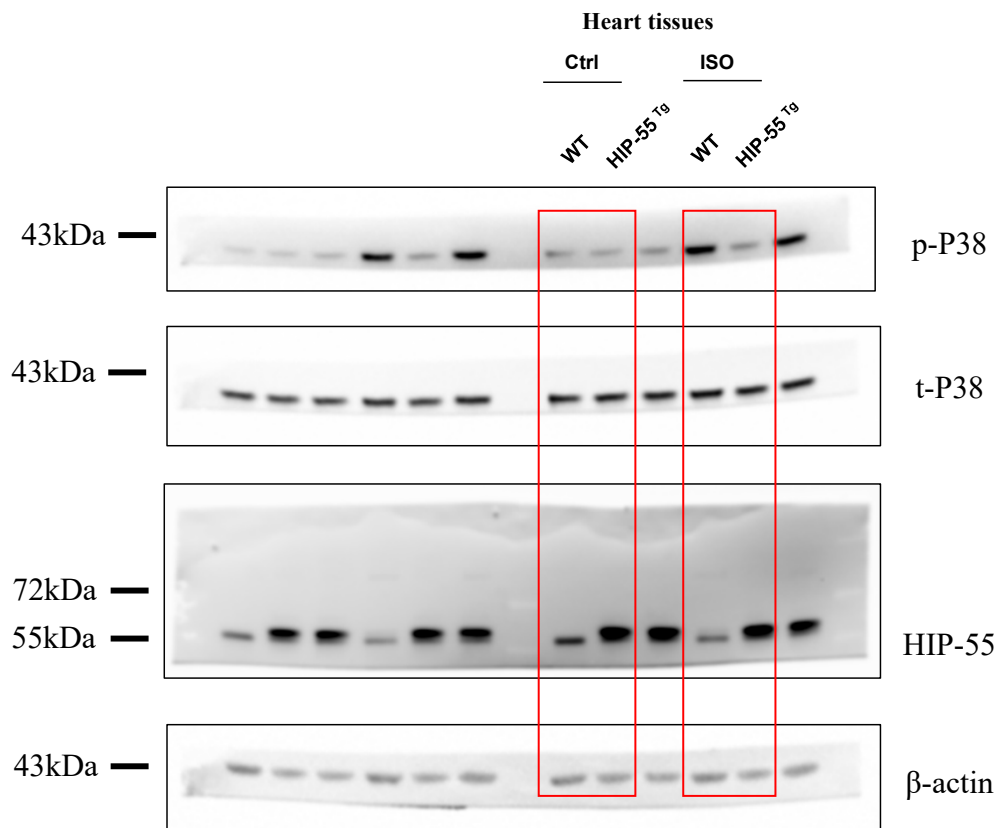

# Full unedited gel

Full unedited gel for Figure 7C

Representative

N=1

|           |   |   |   |   |
|-----------|---|---|---|---|
| ISO       | - | - | + | + |
| Sh-Ctrl   | + | - | + | - |
| Sh-HIP-55 | - | + | - | + |

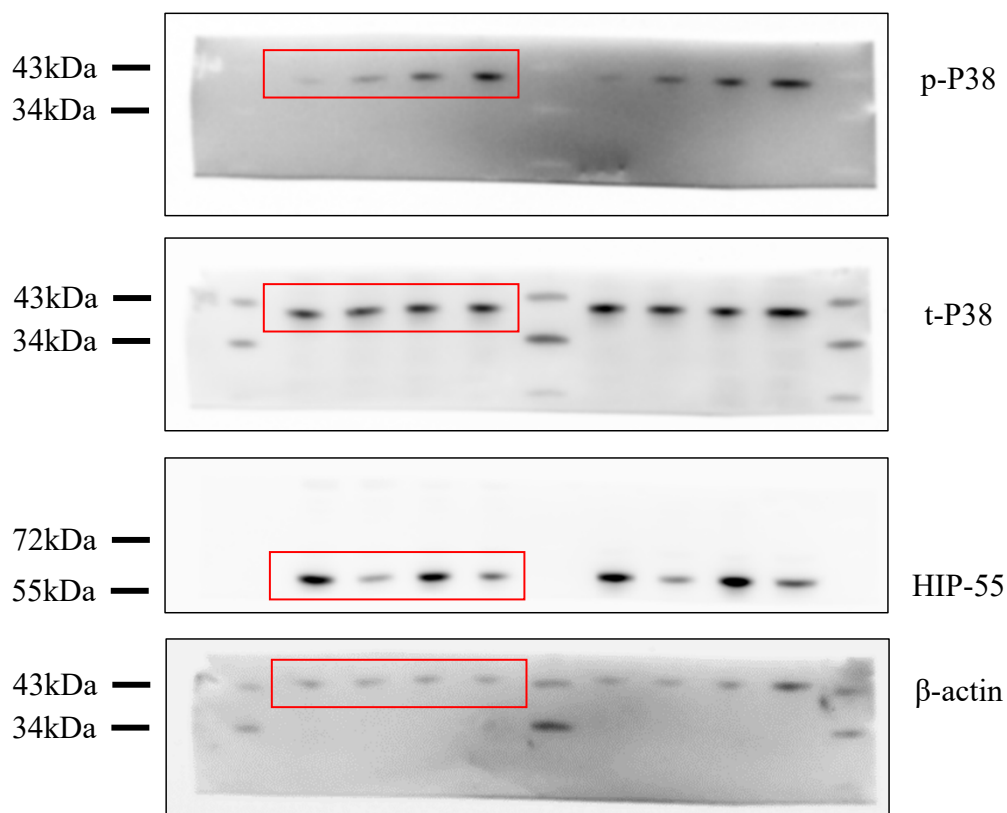

# Full unedited gel

Full unedited gel for Figure 7C

For quantification

N=1

|           |   |   |   |   |
|-----------|---|---|---|---|
| ISO       | - | - | + | + |
| Sh-Ctrl   | + | - | + | - |
| Sh-HIP-55 | - | + | - | + |

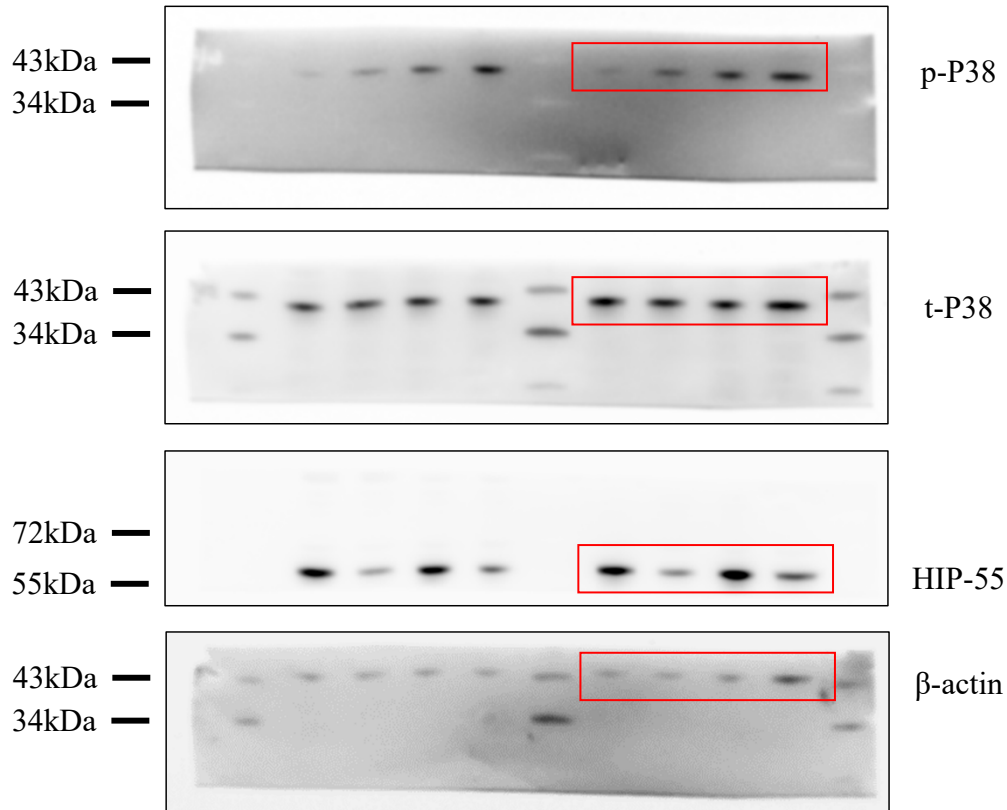

# Full unedited gel

Full unedited gel for Figure 7C

For quantification

N=1

|           |   |   |   |   |
|-----------|---|---|---|---|
| ISO       | - | - | + | + |
| Sh-Ctrl   | + | - | + | - |
| Sh-HIP-55 | - | + | - | + |

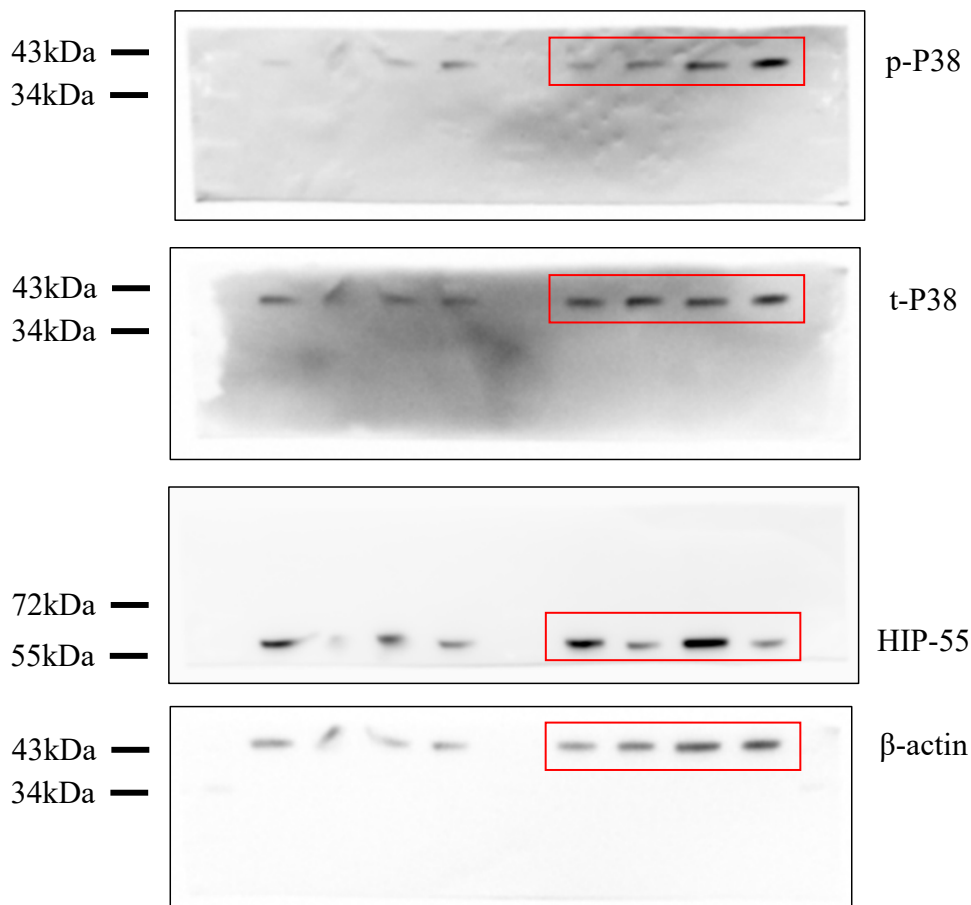

# Full unedited gel

Full unedited gel for Figure 7C

For quantification

N=2

|           |   |   |   |   |   |   |   |   |
|-----------|---|---|---|---|---|---|---|---|
| ISO       | - | - | + | + | - | - | + | + |
| Sh-Ctrl   | + | - | + | - | + | - | + | - |
| Sh-HIP-55 | - | + | - | + | - | + | - | + |

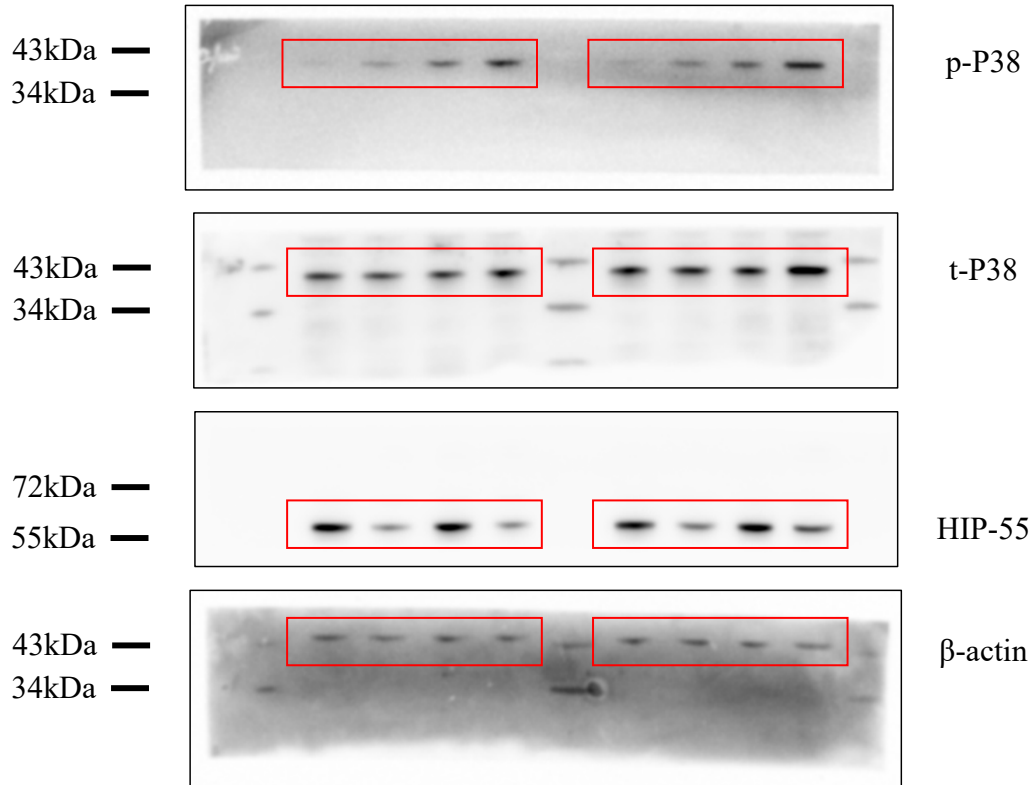

# Full unedited gel

Full unedited gel for Figure 7D

Representative  
N=1

|              |   |   |   |   |
|--------------|---|---|---|---|
| ISO          | - | - | + | + |
| Ad-Sh-Ctrl   | + | - | + | - |
| Ad-Sh-HIP-55 | - | + | - | + |

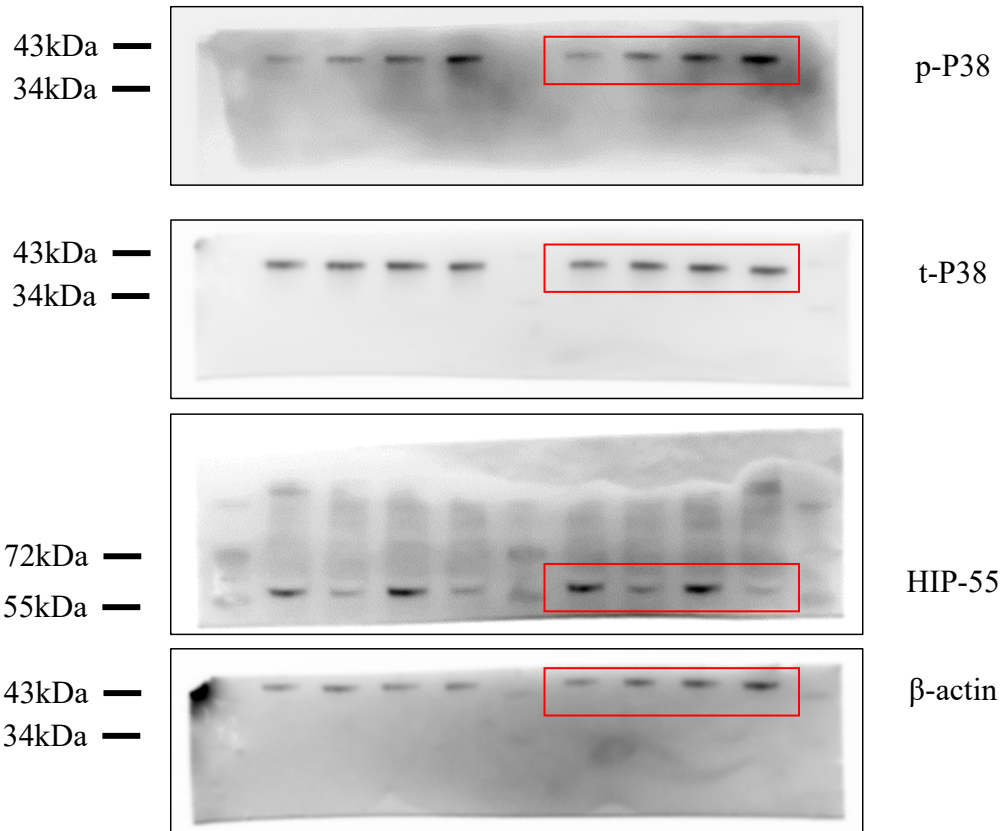



# Full unedited gel

Full unedited gel for Figure 7D

For quantification

N=1

|                     |   |   |   |   |
|---------------------|---|---|---|---|
| <b>ISO</b>          | - | - | + | + |
| <b>Ad-Sh-Ctrl</b>   | + | - | + | - |
| <b>Ad-Sh-HIP-55</b> | - | + | - | + |

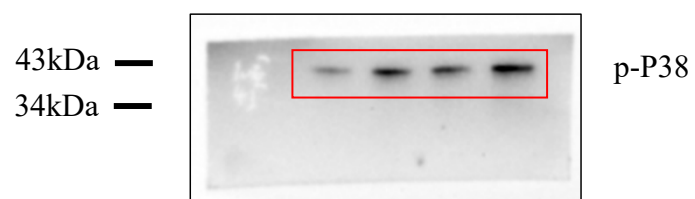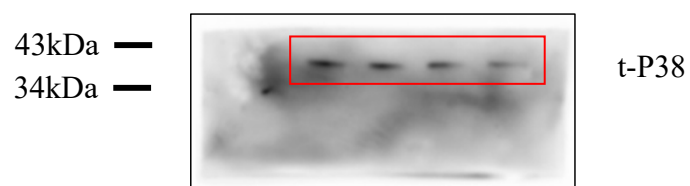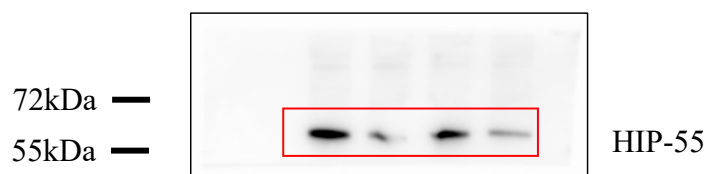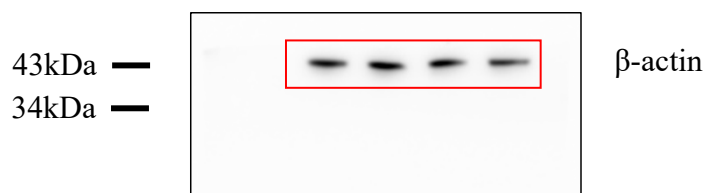



# Full unedited gel

Full unedited gel for Figure 7D

For quantification

N=2

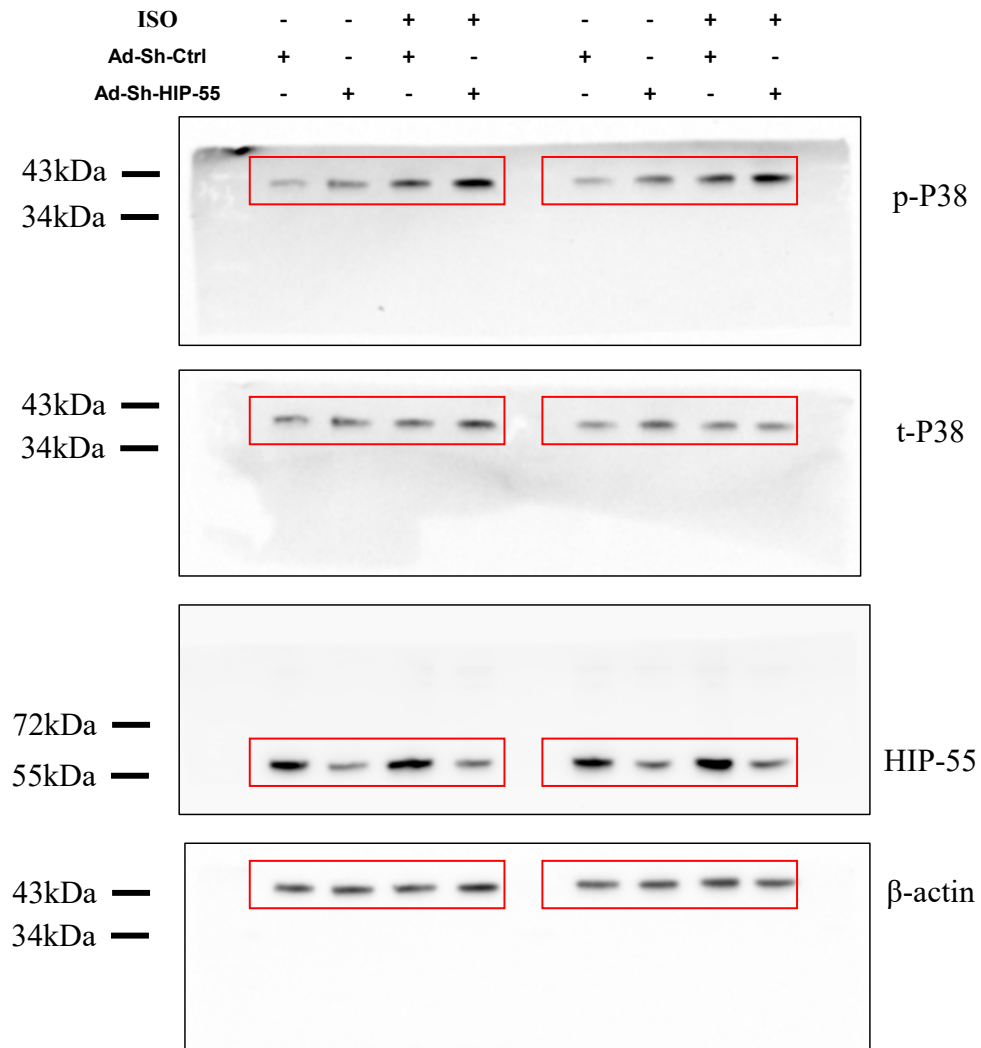

# Full unedited gel

Full unedited gel for Figure 7E

Representative

N=1

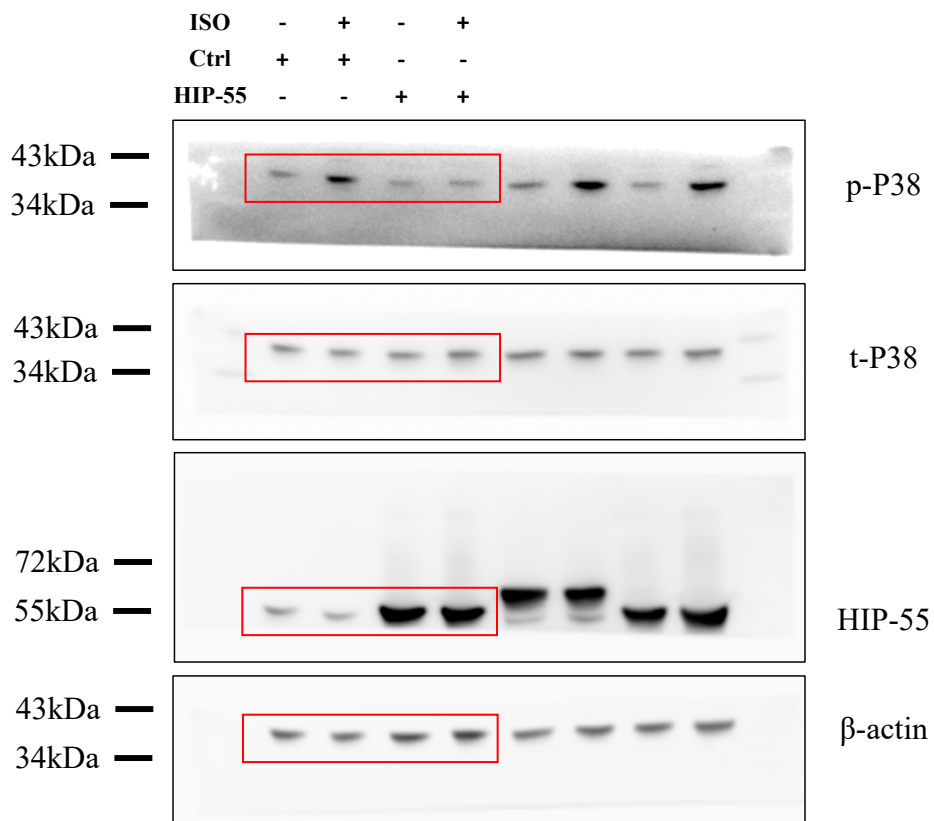

# Full unedited gel

Full unedited gel for Figure 7E

Representative

N=1

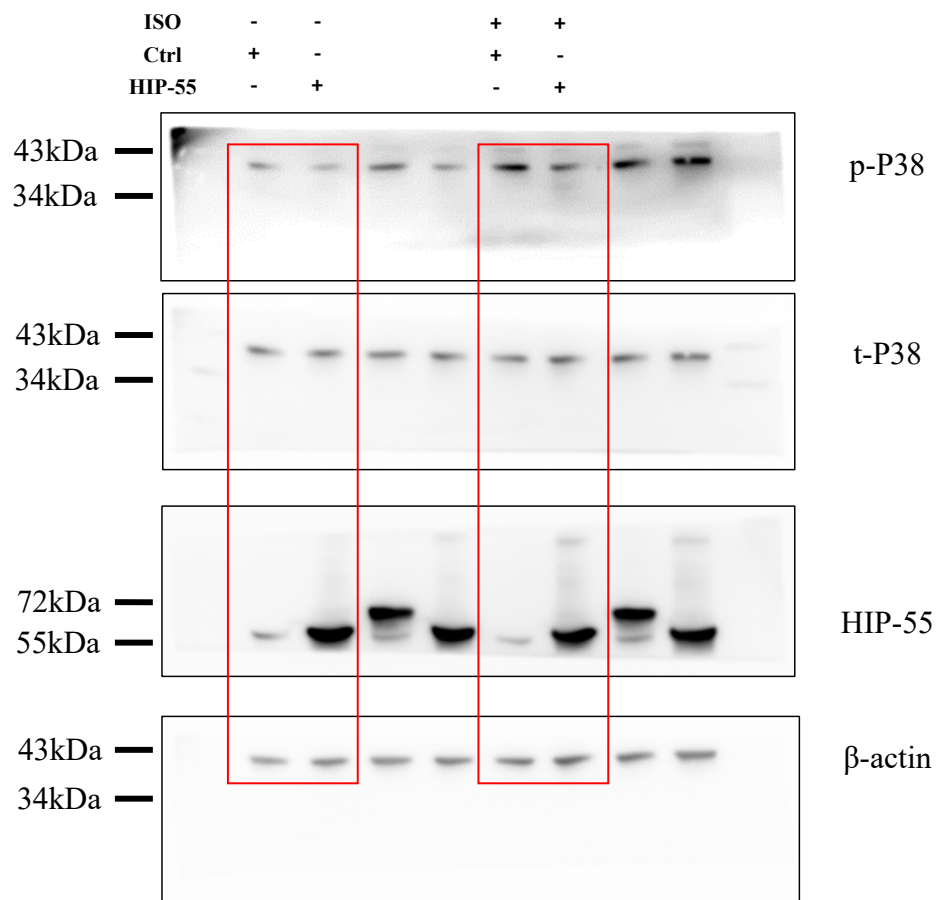

# Full unedited gel

Full unedited gel for Figure 7E

For quantification

N=1

|          |   |   |   |   |
|----------|---|---|---|---|
| ISO      | - | - | + | + |
| Ctrl     | + | - | + | - |
| HIP-55WT | - | + | - | + |

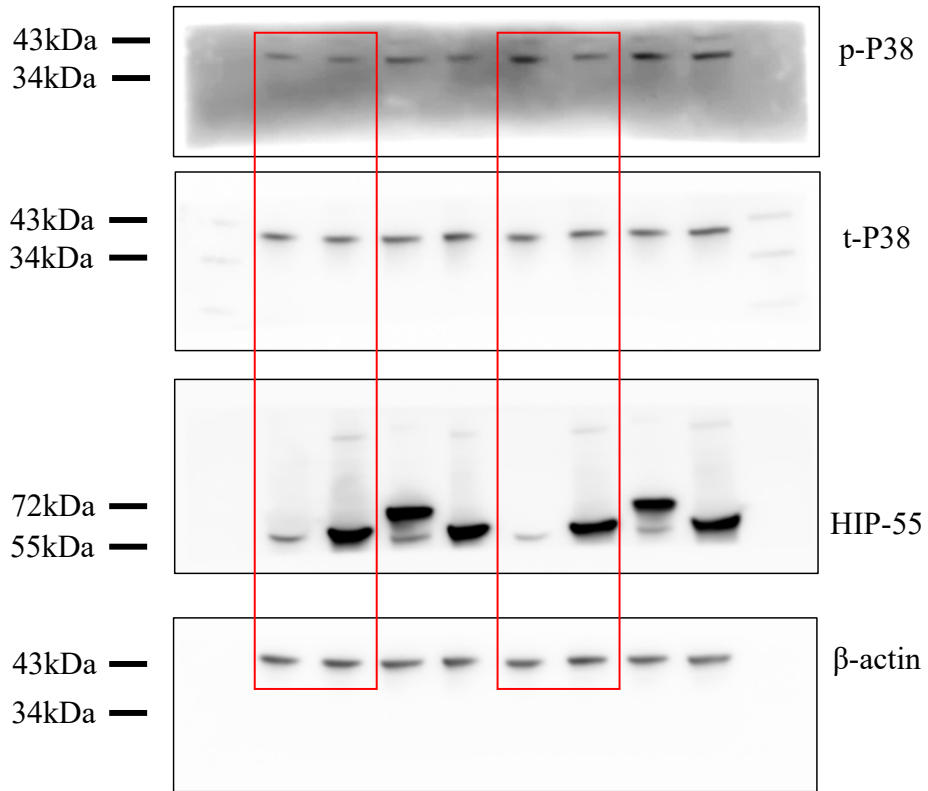

# Full unedited gel

Full unedited gel for Figure 7E

For quantification

N=1

|        |   |   |   |   |
|--------|---|---|---|---|
| ISO    | - | + | - | + |
| Ctrl   | + | - | + | - |
| HIP-55 | - | - | + | + |

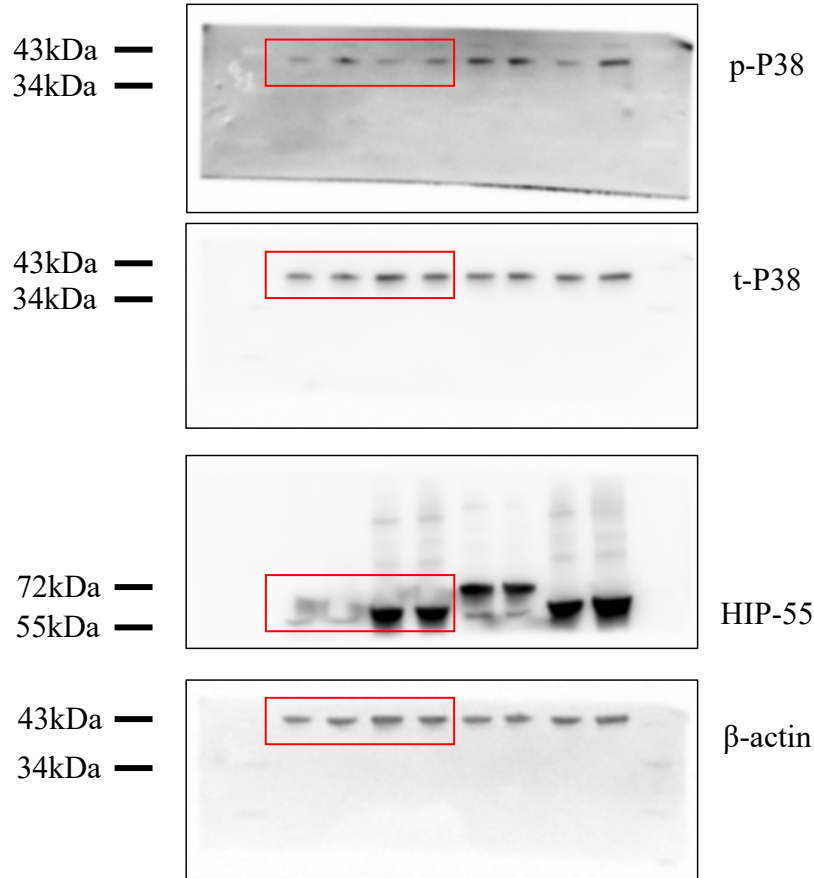

# Full unedited gel

Full unedited gel for Figure 7E

For quantification

N=1

|        |   |   |   |   |
|--------|---|---|---|---|
| ISO    | - | + | - | + |
| Ctrl   | + | - | + | - |
| HIP-55 | - | - | + | + |

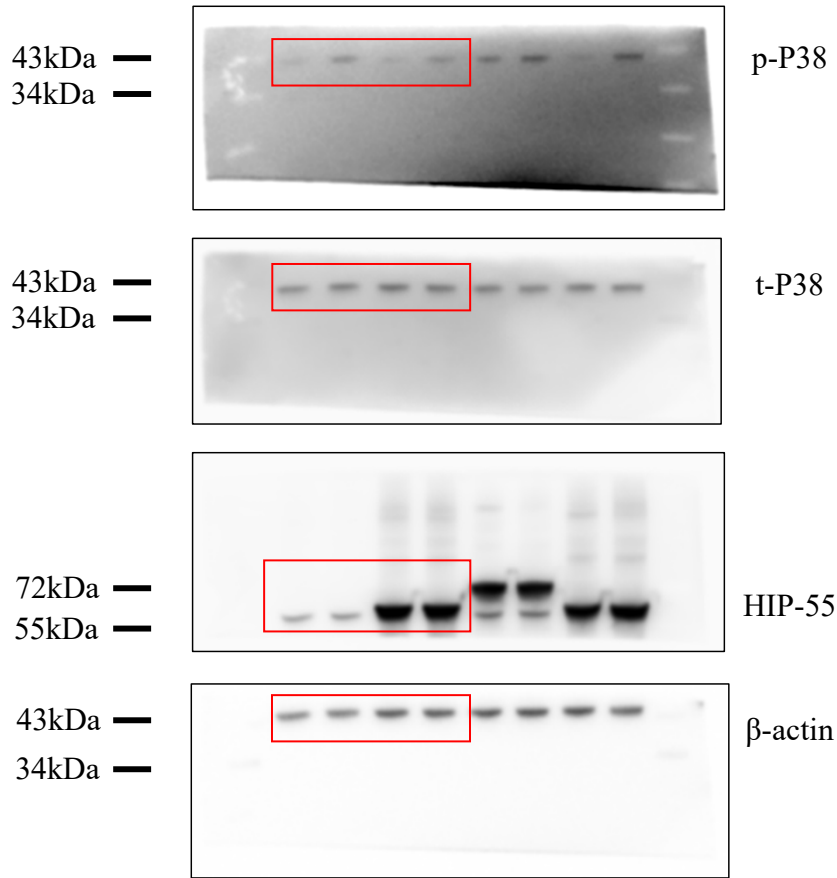

# Full unedited gel

Full unedited gel for Figure 7F

Representative  
N=1

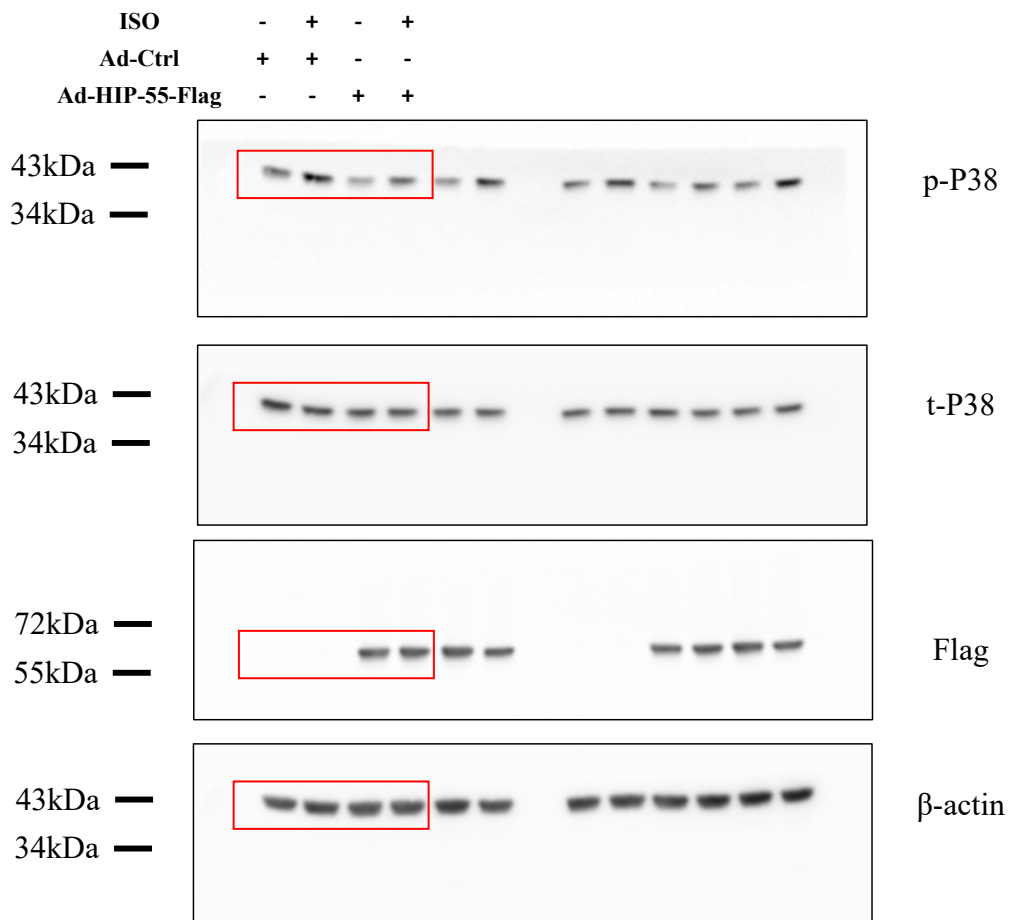





# Full unedited gel

Full unedited gel for Figure 7F

For quantification

N=1

|                |   |   |   |   |
|----------------|---|---|---|---|
| ISO            | - | + | - | + |
| Ad-Ctrl        | + | + | - | - |
| Ad-HIP-55-Flag | - | - | + | + |

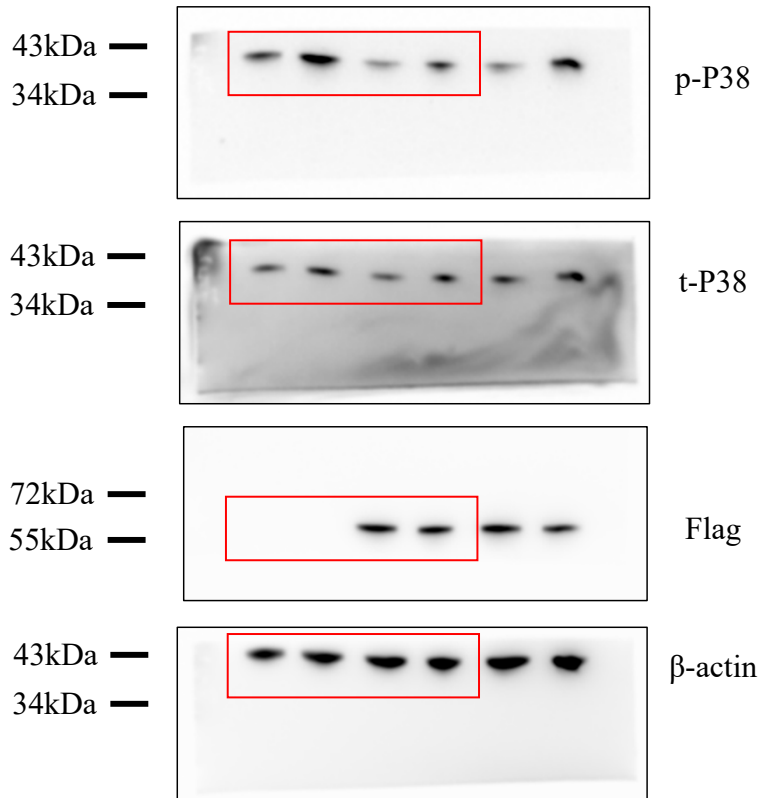

# Full unedited gel

Full unedited gel for Figure 7F

For quantification

N=2

|                |   |   |   |   |  |   |   |   |   |
|----------------|---|---|---|---|--|---|---|---|---|
| ISO            | - | + | - | + |  | - | + | - | + |
| Ad-Ctrl        | + | + | - | - |  | + | + | - | - |
| Ad-HIP-55-Flag | - | - | + | + |  | - | - | + | + |

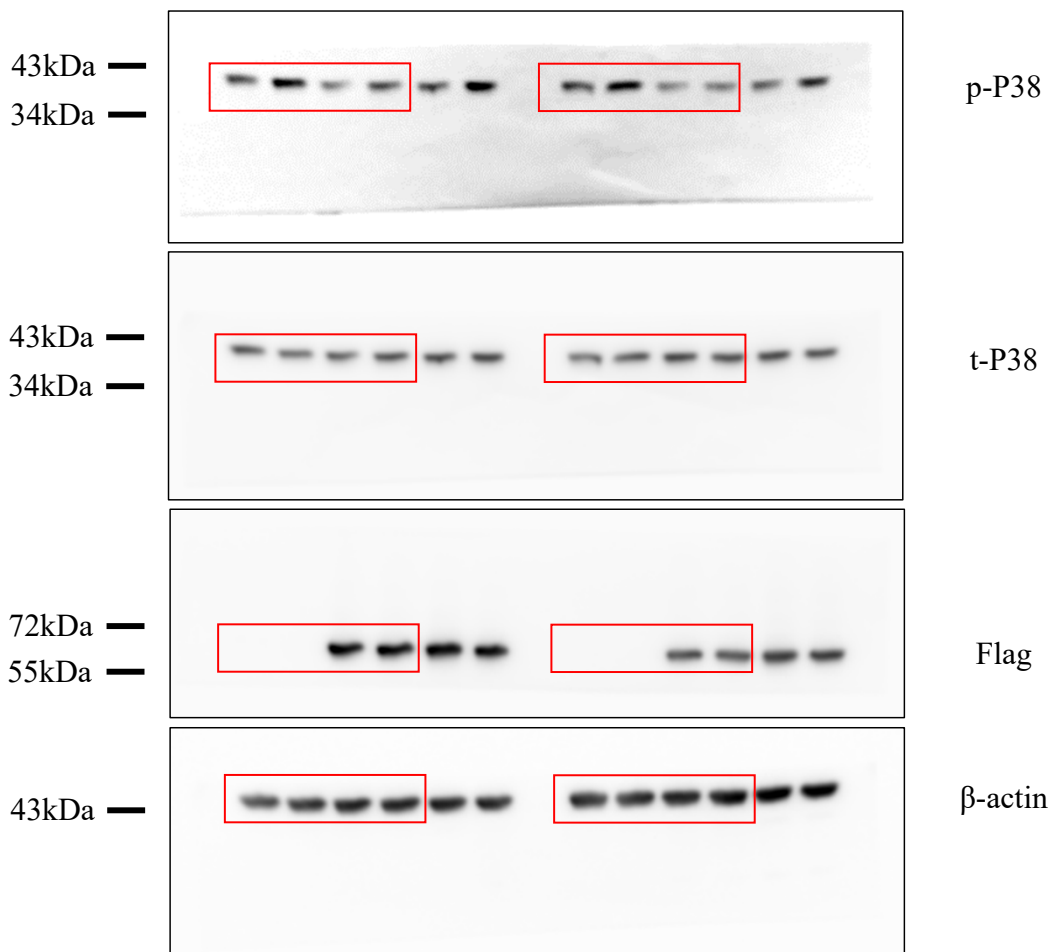

# Full unedited gel

Full unedited gel for Figure 7G

Representative

N=1

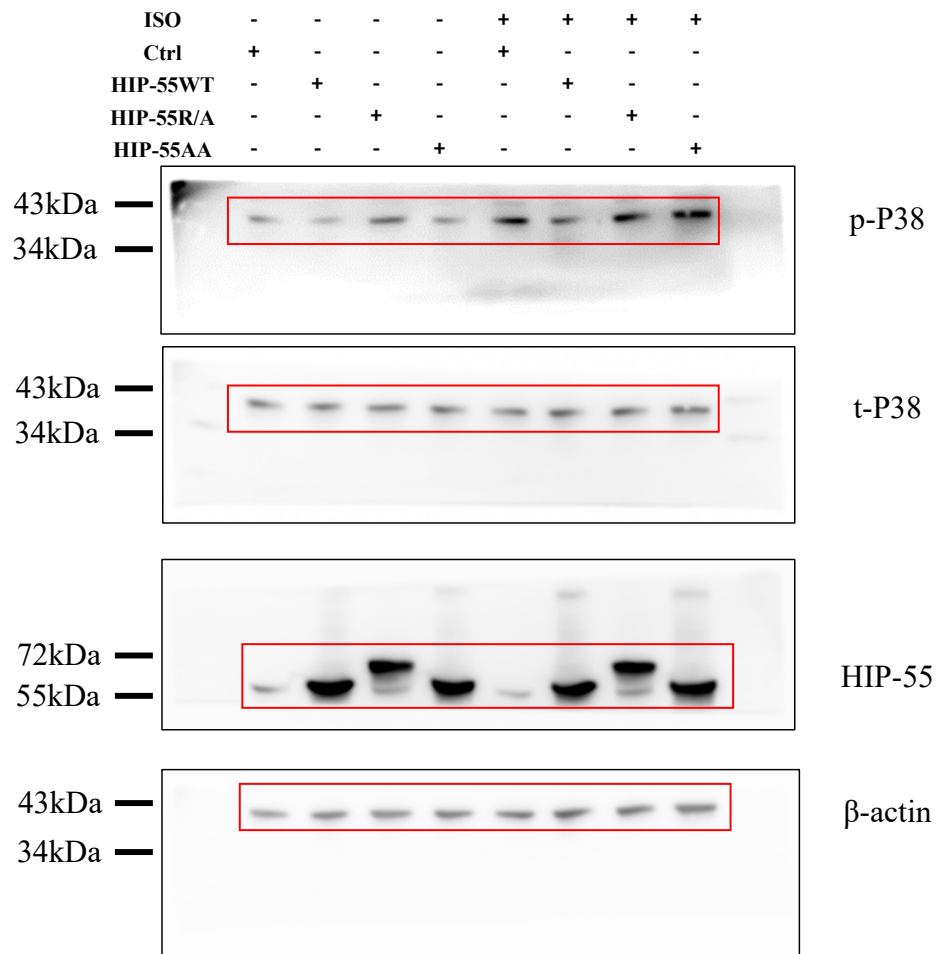

# Full unedited gel

Full unedited gel for Figure 7G

For quantification

N=1

|           |   |   |   |   |   |   |   |   |
|-----------|---|---|---|---|---|---|---|---|
| ISO       | - | - | - | - | + | + | + | + |
| Ctrl      | + | - | - | - | + | - | - | - |
| HIP-55WT  | - | + | - | - | - | + | - | - |
| HIP-55R/A | - | - | + | - | - | - | + | - |
| HIP-55AA  | - | - | - | + | - | - | - | + |

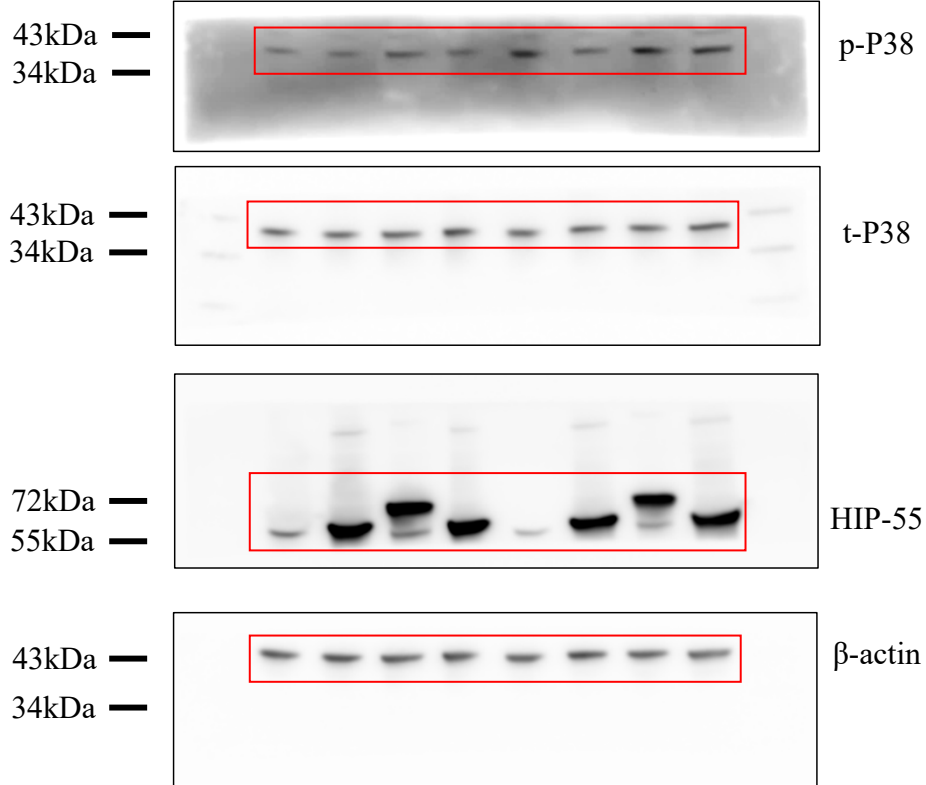

# Full unedited gel

Full unedited gel for Figure 7G

For quantification

N=1

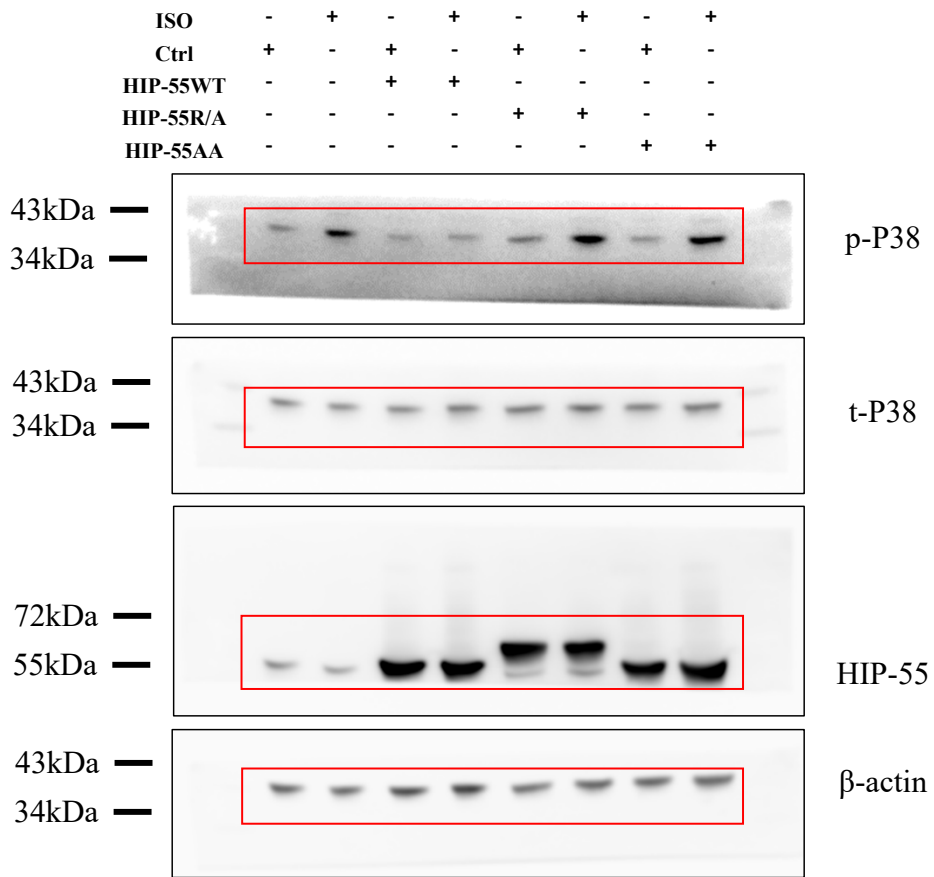

# Full unedited gel

Full unedited gel for Figure 7G

For quantification

N=1

|           |   |   |   |   |   |   |   |   |
|-----------|---|---|---|---|---|---|---|---|
| ISO       | - | + | - | + | - | + | - | + |
| Ctrl      | + | - | + | - | + | - | + | - |
| HIP-55WT  | - | - | + | + | - | - | - | - |
| HIP-55R/A | - | - | - | - | + | + | - | - |
| HIP-55AA  | - | - | - | - | - | - | + | + |

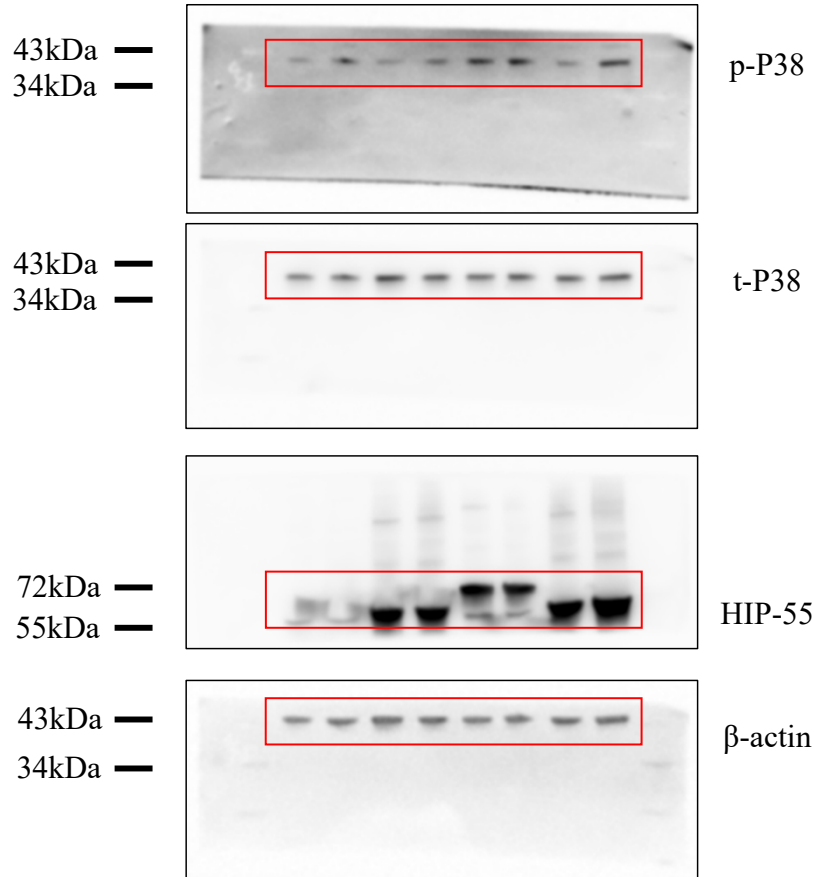

# Full unedited gel

Full unedited gel for Figure 7G

For quantification

N=1

|           |   |   |   |   |   |   |   |   |
|-----------|---|---|---|---|---|---|---|---|
| ISO       | - | + | - | + | - | + | - | + |
| Ctrl      | + | - | + | - | + | - | + | - |
| HIP-55WT  | - | - | + | + | - | - | - | - |
| HIP-55R/A | - | - | - | - | + | + | - | - |
| HIP-55AA  | - | - | - | - | - | - | + | + |

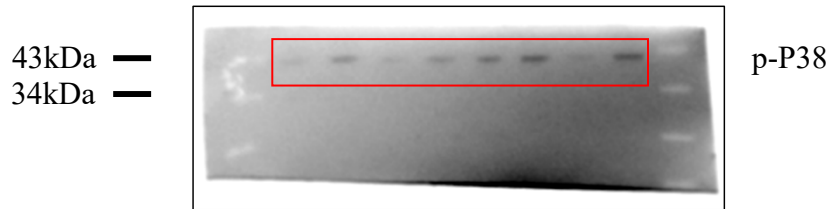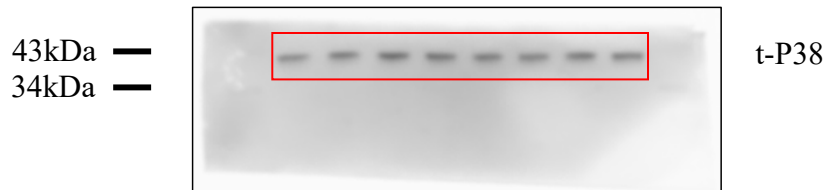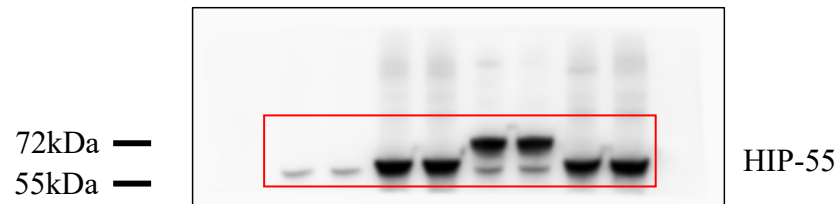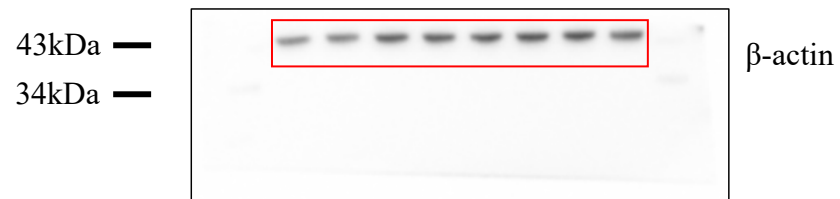

# Full unedited gel

Full unedited gel for Figure 7H

Representative  
N=1

|                  |   |   |   |   |   |   |
|------------------|---|---|---|---|---|---|
| ISO              | - | + | - | + | - | + |
| Ad-Ctrl          | + | + | - | - | - | - |
| Ad-HIP-55WT-Flag | - | - | + | + | - | - |
| Ad-HIP-55AA-Flag | - | - | - | - | + | + |

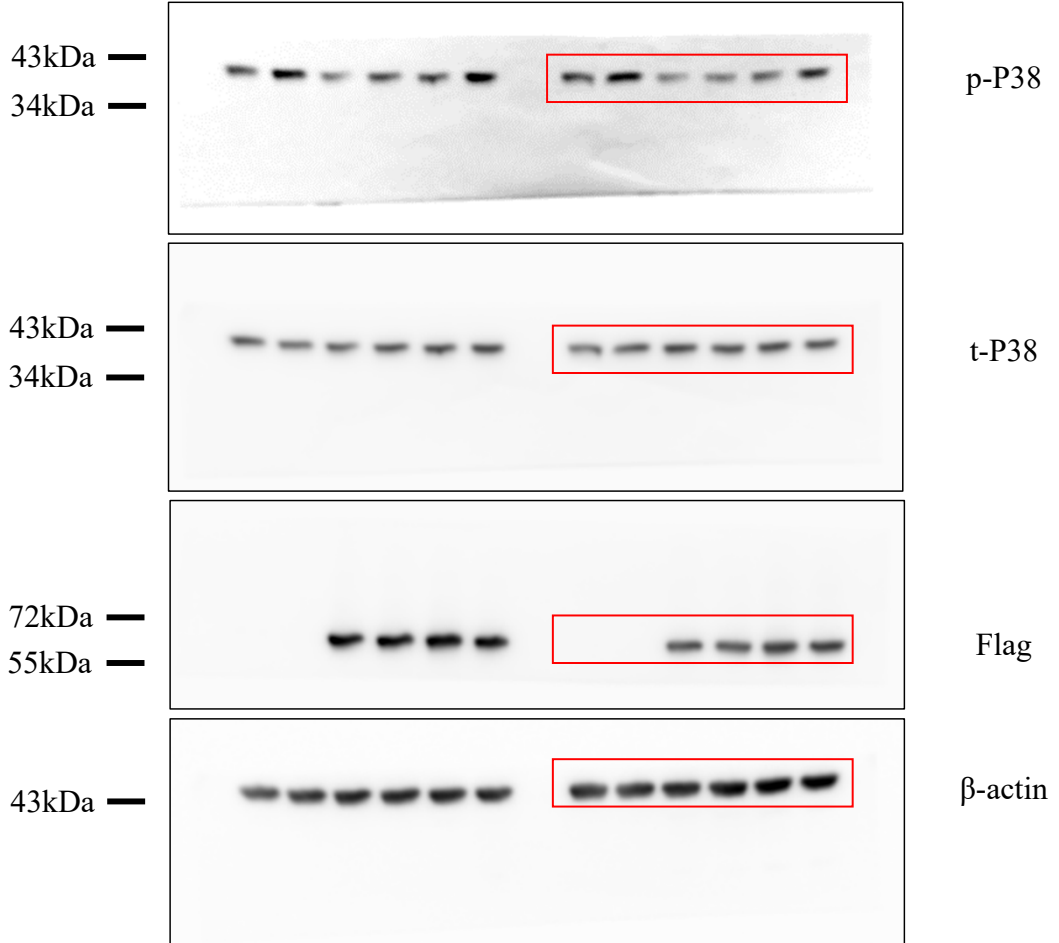



# Full unedited gel

Full unedited gel for Figure 7H

For quantification

N=1

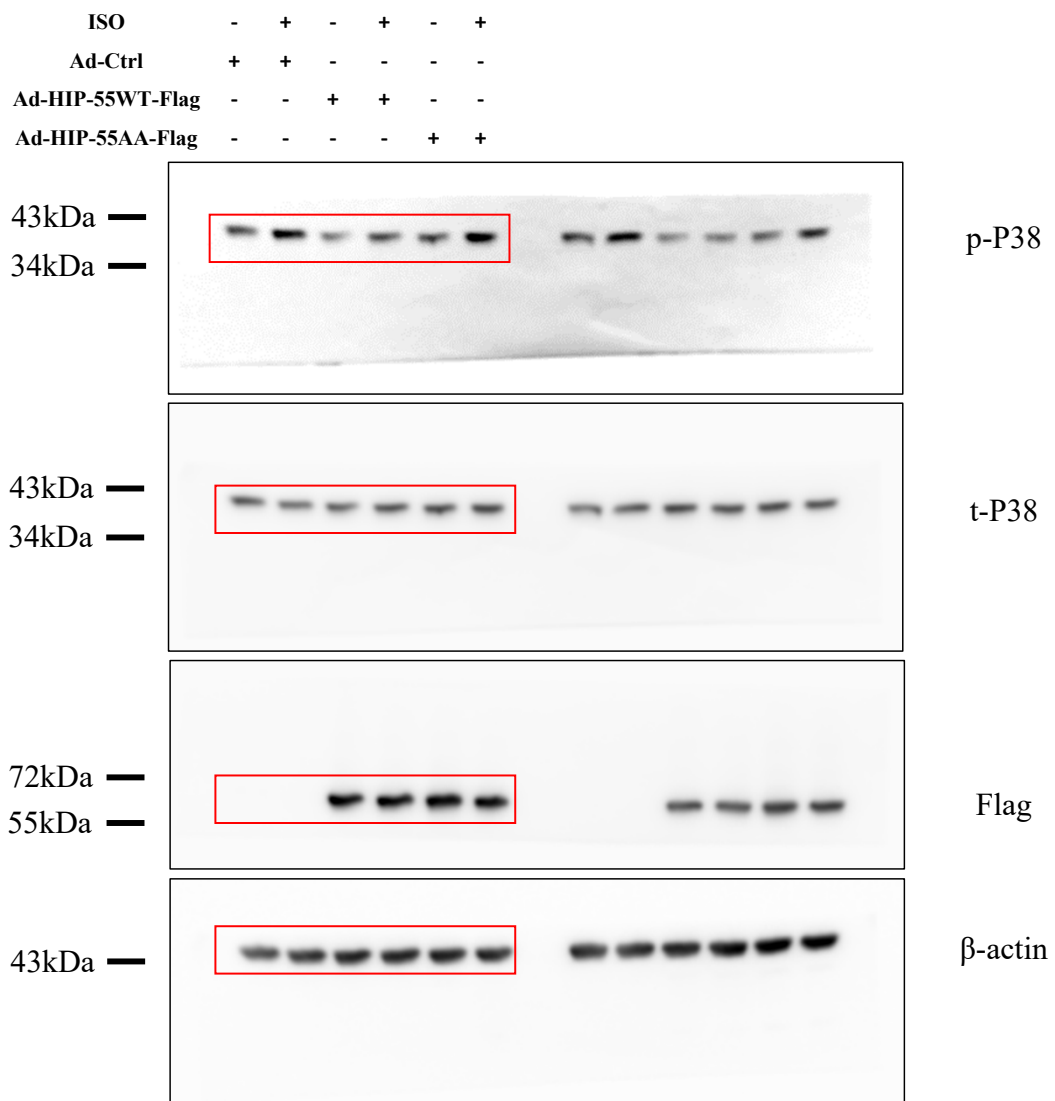

# Full unedited gel

Full unedited gel for Figure 7H

For quantification

N=1

|                  |   |   |   |   |   |   |
|------------------|---|---|---|---|---|---|
| ISO              | - | + | - | + | - | + |
| Ad-Ctrl          | + | + | - | - | - | - |
| Ad-HIP-55WT-Flag | - | - | + | + | - | - |
| Ad-HIP-55AA-Flag | - | - | - | - | + | + |

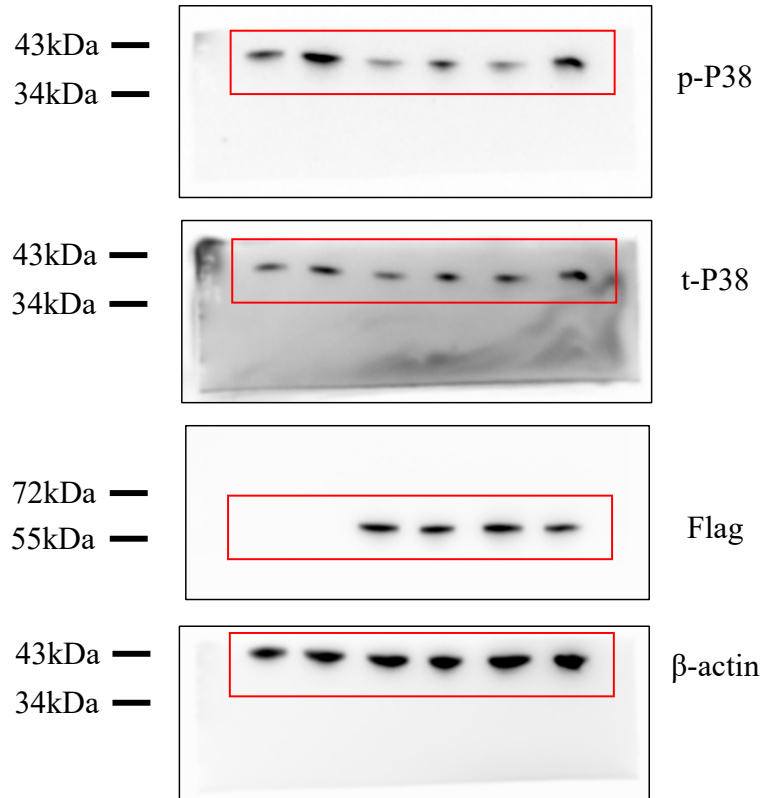

# Full unedited gel

Full unedited gel for Figure 7H

For quantification

N=2

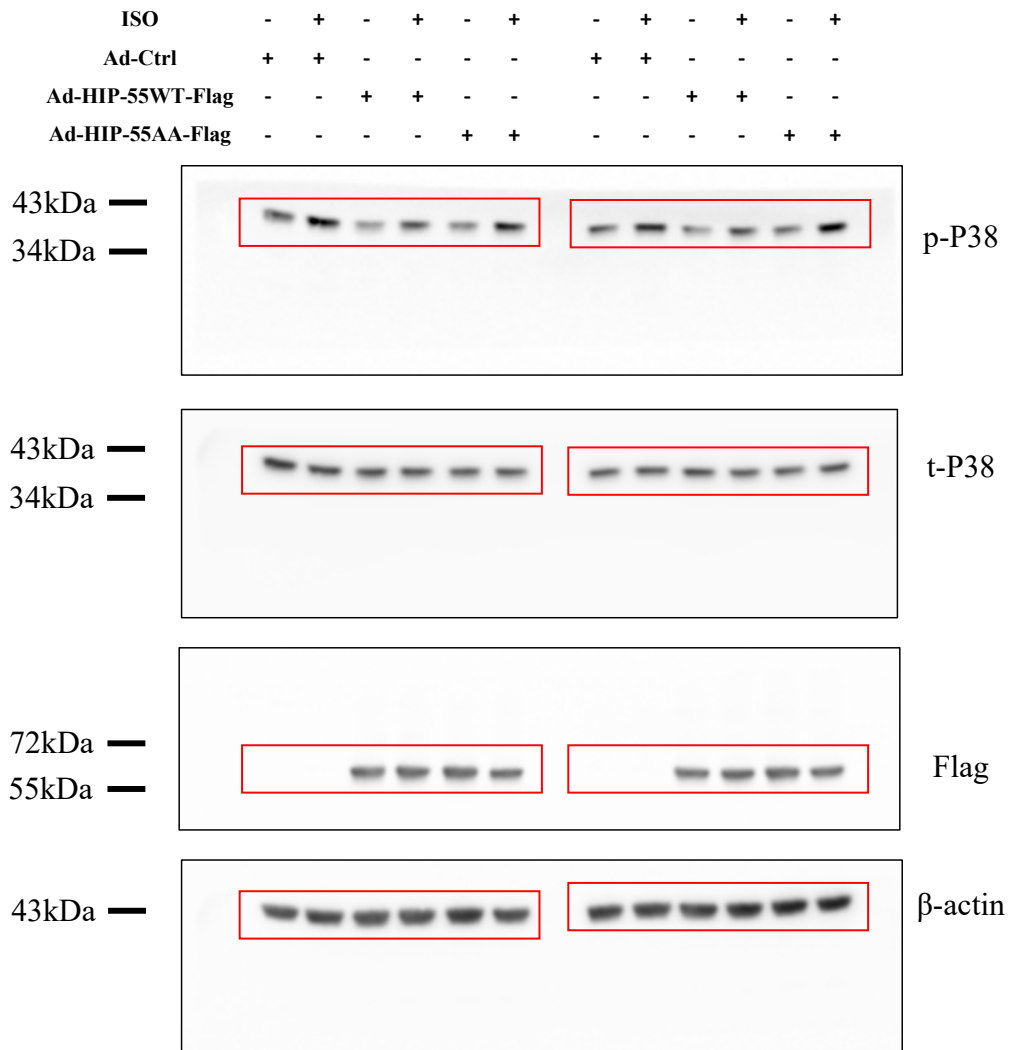

# Full unedited gel

Full unedited gel for Figure 8A

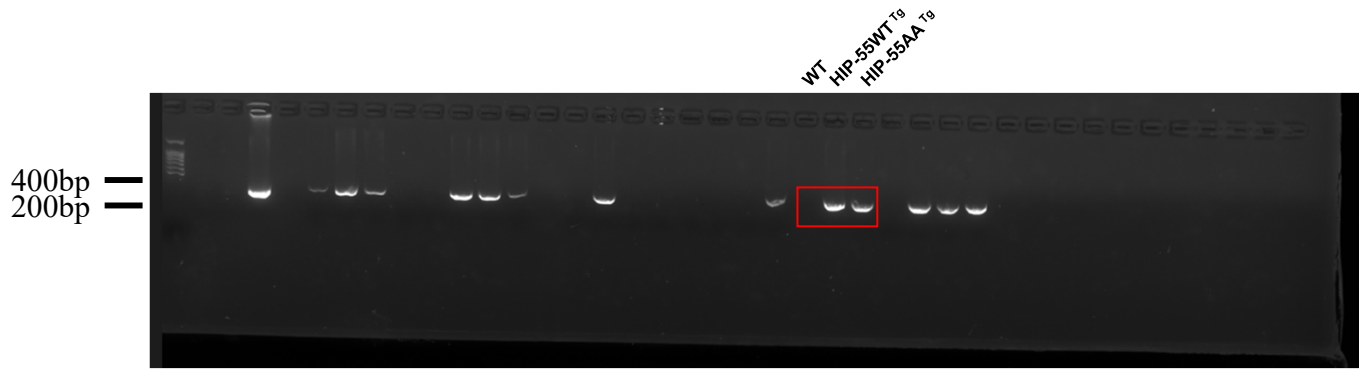

Full unedited gel for Figure 8B

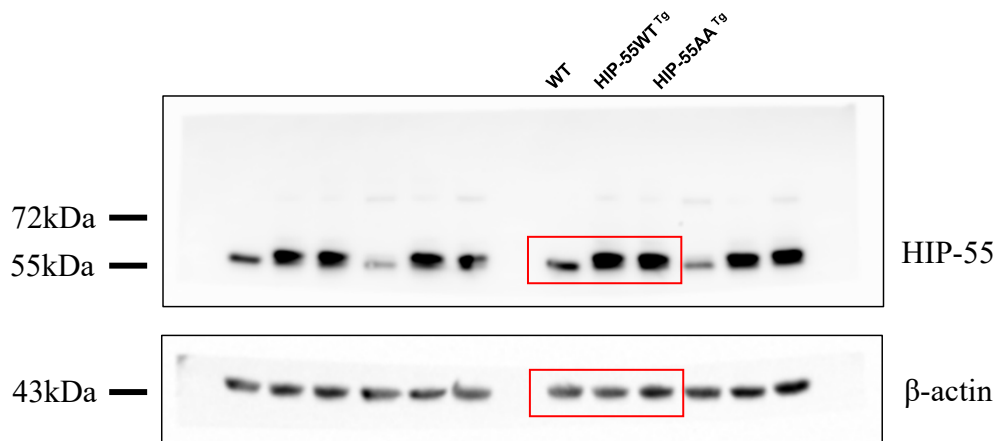

# Full unedited gel

Full unedited gel for Figure 8D

Representative

N=1

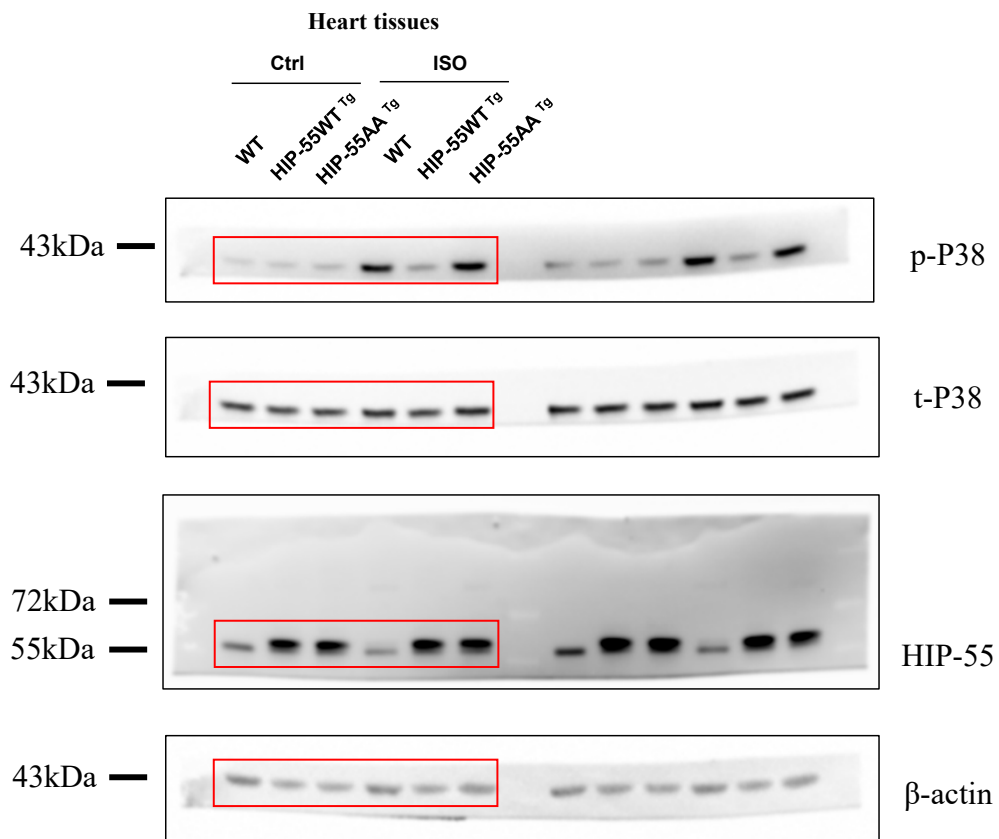

Full unedited gel for Figure 8D

For quantification

N=1

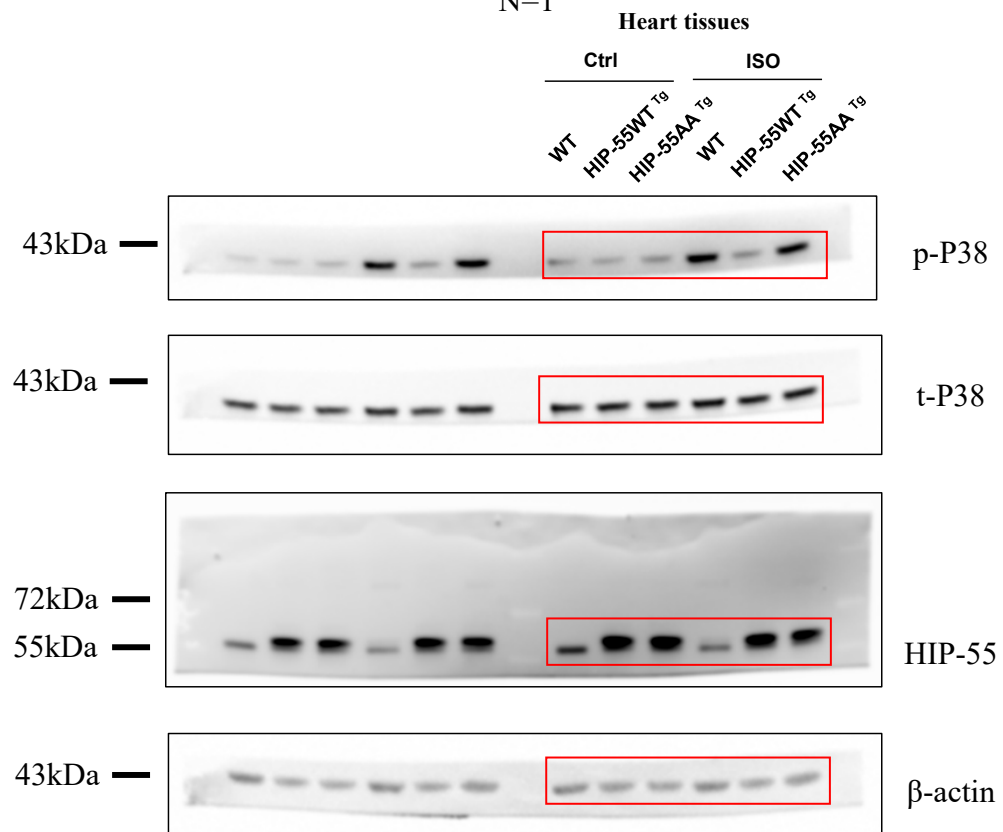

# Full unedited gel

Full unedited gel for Figure 8D

For quantification

N=2

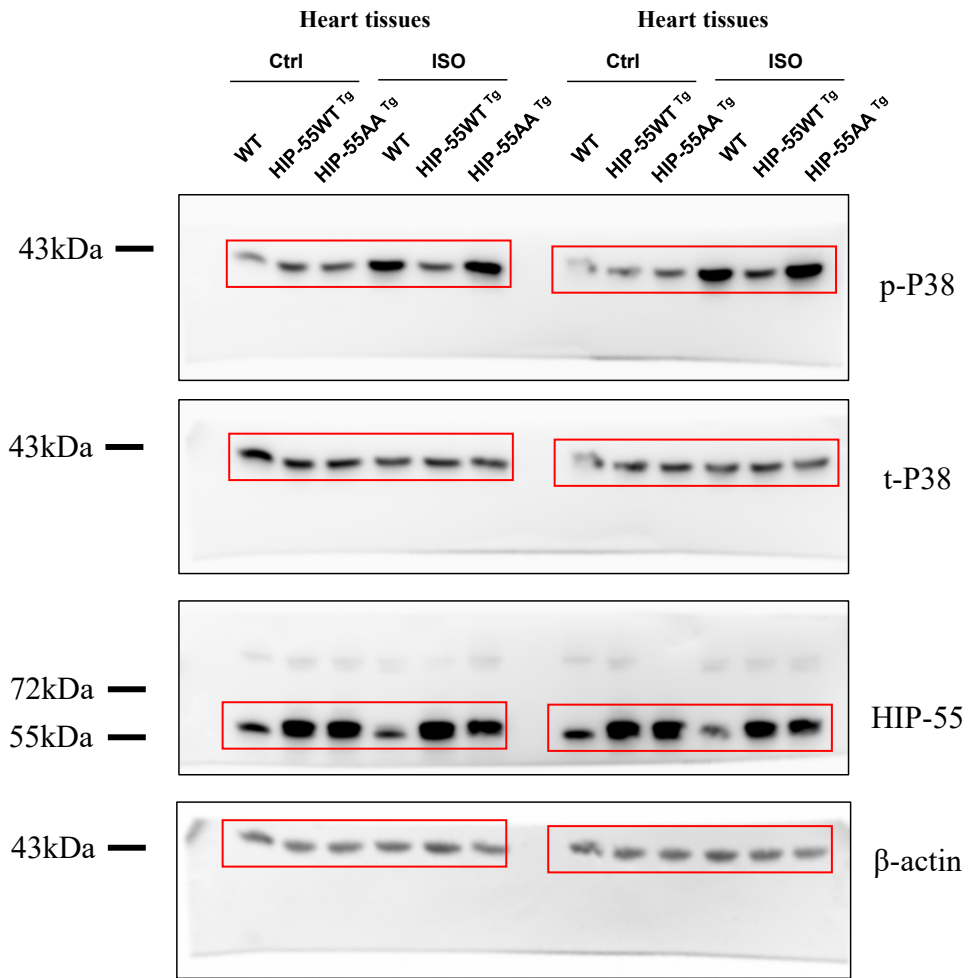

# Full unedited gel

Full unedited gel for Figure 8D

For quantification  
N=2

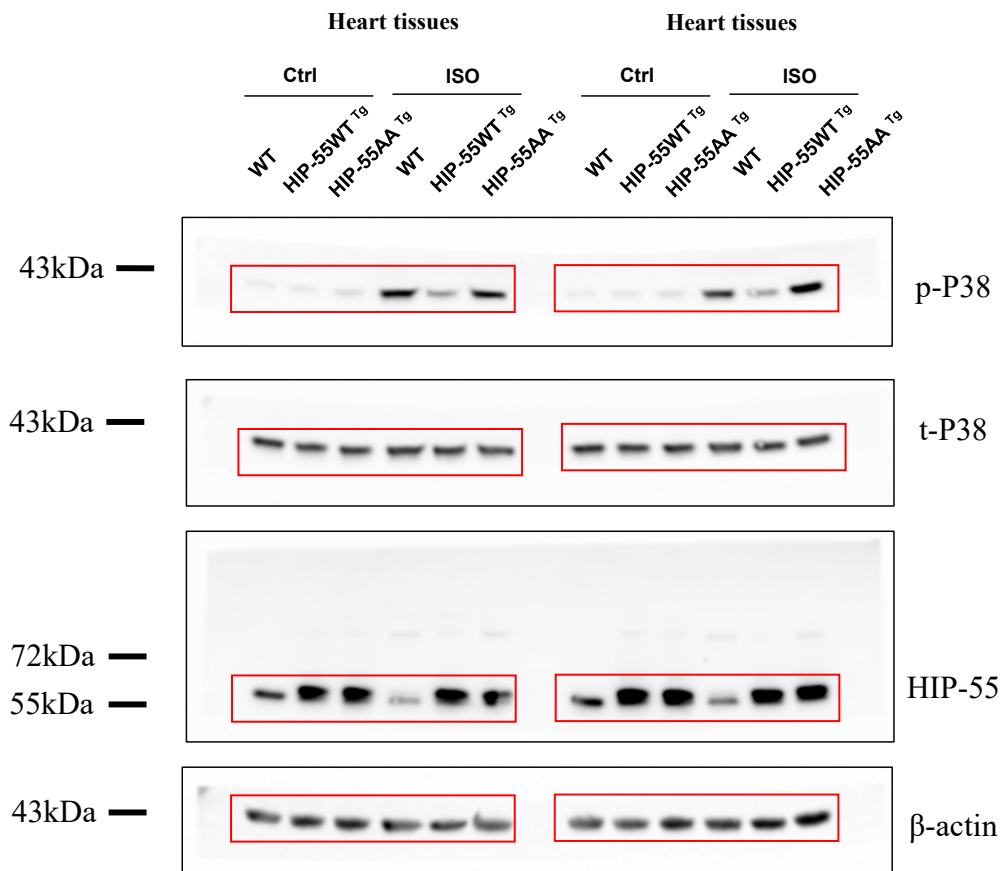

Supplement: cir-150-938-s002.pdf [file cir-150-938-s002.pdf]
